# Mapping Pharmacologically-induced Functional Reorganisation onto the Brain's Neurotransmitter Landscape

Andrea I. Luppi<sup>1,2,3,4\*</sup>, Justine Y. Hansen<sup>5</sup>, Ram Adapa<sup>1</sup>, Robin L. Carhart-Harris<sup>6</sup>, Leor Roseman<sup>7</sup>, Daniel Golkowski<sup>8</sup>, Andreas Ranft<sup>9</sup>, Rüdiger Ilg<sup>8,10</sup>, Denis Jordan<sup>11</sup>, Alexander R. D. Peattie<sup>1,2</sup>, Anne E. Manktelow<sup>1</sup>, Draulio B. de Araujo<sup>12</sup>, Stefano L. Sensi<sup>13,14</sup>, Adrian M. Owen<sup>15</sup>, Lorina Naci<sup>16</sup>, David K. Menon<sup>1,17</sup>, Bratislav Misic<sup>5</sup>, Emmanuel A. Stamatakis<sup>1,2</sup>

<sup>1</sup>Division of Anaesthesia, University of Cambridge, Cambridge, UK.

<sup>2</sup>Department of Clinical Neurosciences, University of Cambridge, Cambridge, UK.

<sup>3</sup>Leverhulme Centre for the Future of Intelligence, University of Cambridge, Cambridge, UK.

<sup>4</sup>The Alan Turing Institute, London, UK.

<sup>5</sup>McConnell Brain Imaging Center, Montreal Neurological Institute, McGill University, Montreal, QC, Canada.

<sup>6</sup>Psychedelics Division - Neuroscape, Department of Neurology, University of California San Francisco, San Francisco, CA, USA.

<sup>7</sup>Center for Psychedelic Research, Department of Brain Sciences, Imperial College London, London, UK.

<sup>8</sup>Department of Neurology, Klinikum rechts der Isar, Technical University Munich, München, Germany.

<sup>9</sup>Technical University of Munich, School of Medicine, Department of Anesthesiology and Intensive Care, Munich, Germany.

<sup>10</sup>Asklepios Clinic, Department of Neurology, Bad Tölz, Germany.

<sup>11</sup>Department of Anaesthesiology and Intensive Care Medicine, Klinikum rechts der Isar, Technical University Munich, München, Germany.

<sup>12</sup>Department of Neuroscience and Imaging and Clinical Science, Center for Advanced Studies and Technology, Institute for Advanced Biomedical Technologies, University "G. d'Annunzio" Chieti-Pescara, Chieti, Italy.

<sup>13</sup>Institute for Memory Impairments and Neurological Disorders, University of California-Irvine, Irvine, CA, USA.

<sup>14</sup>Brain Institute, Federal University of Rio Grande do Norte, Natal, RN, Brazil.

<sup>15</sup>Department of Psychology and Department of Physiology and Pharmacology, The Brain and Mind Institute, Western University, London, ON, Canada.

<sup>16</sup>Trinity College Institute of Neuroscience, School of Psychology, Trinity College Dublin, Dublin, Ireland.

<sup>17</sup>Wolfson Brain Imaging Centre, University of Cambridge, Cambridge, UK.

Corresponding author: email: [al857@cam.ac.uk](mailto:al857@cam.ac.uk)

## Abstract

58  
59  
60  
61  
62  
63  
64  
65  
66  
67  
68  
69  
70  
71  
72  
73  
74  
75  
76  
77  
78  
79  
80

To understand how pharmacological interventions can exert their powerful effects on brain function, we need to understand how they engage the brain's rich neurotransmitter landscape. Here, we bridge microscale molecular chemoarchitecture and pharmacologically-induced macroscale functional reorganisation, by relating the regional distribution of 18 neurotransmitter receptors and transporters obtained from Positron Emission Tomography, and the regional changes in functional MRI connectivity induced by 7 different mind-altering drugs including anaesthetics, psychedelics, and cognitive enhancers. Our results reveal that psychoactive drugs exert their effects on brain function by engaging multiple neurotransmitter systems. Intriguingly, the effects of both anaesthetics and psychedelics on brain function, though opposite, are organised along hierarchical gradients of brain structure and function. Finally, we show that regional co-susceptibility to pharmacological interventions recapitulates co-susceptibility to disorder-induced structural alterations. Collectively, these results highlight rich statistical patterns relating molecular chemoarchitecture and drug-induced reorganisation of the brain's functional architecture.

**Keywords:** PET; receptors; neurotransmitters; functional MRI; pharmacology; anaesthesia; psychedelic; cognitive enhancer

## 81 Introduction

82 Understanding how the brain orchestrates complex signals across spatial and  
83 temporal scales to support cognition and consciousness is a fundamental challenge  
84 of contemporary neuroscience. By inducing profound but reversible alterations of  
85 brain function, psychoactive compounds provide neuroscientists with the means to  
86 manipulate the brain without requiring surgical intervention. In combination with non-  
87 invasive brain imaging techniques such as functional MRI, acute pharmacological  
88 interventions have therefore emerged as a prominent tool for causal investigation of  
89 the relationship between brain and cognitive function in healthy humans <sup>1</sup>.

90

91 Mind-altering pharmacological agents also play a fundamental role in modern clinical  
92 practice. The invention of anaesthesia was a major milestone in medical history,  
93 enabling millions of life-saving surgeries to take place every year <sup>2</sup>. Other drugs that  
94 influence the mind without suppressing consciousness, such as the cognitive  
95 enhancers modafinil and methylphenidate, have found useful applications in  
96 alleviating the cognitive symptoms of syndromes such as ADHD, narcolepsy, and  
97 traumatic brain injury (TBI) <sup>3-11</sup>. More recently, classic and “atypical” psychedelics  
98 are increasingly being investigated for their potential to provide breakthrough  
99 avenues to treat psychiatric conditions, with recent successes in clinical trials  
100 heralding a possible end to the current scarcity of therapies for treatment-resistant  
101 depression and other neuropsychiatric disorders <sup>12-17</sup>. For these convergent reasons,  
102 the effects of anaesthetics, psychedelics, and cognitive enhancers on brain function  
103 are becoming the focus of intense investigation, revealing both similarities and  
104 differences between them <sup>18-26</sup>.

105 Pharmacological agents exert their mind-altering effects by tuning the brain’s  
106 neurotransmitter landscape. Neurotransmitters engage receptors on neurons’  
107 membrane to mediate the transfer and propagation of signals between cells,  
108 modulate the functional configurations of neuronal circuits, and ultimately shape  
109 network-wide communication <sup>27-31</sup>. Several psychoactive drugs appear to exert their  
110 effects on the mind and brain primarily through one or few specific neurotransmitters:  
111 the main action of the general anaesthetic propofol is enhancement of synaptic  
112 transmission mediated by GABA-A receptors, a mechanism that is also shared by

113 sevoflurane, which in addition attenuates glutamatergic synaptic signalling (mediated  
114 by both AMPA and NMDA receptors) <sup>2,32–39</sup>. Ketamine (a dissociative anaesthetic at  
115 high doses, and atypical psychedelic at low doses) is an NMDA receptor antagonist  
116 <sup>40–45</sup>; the classic psychedelics LSD and DMT are agonists of the serotonin 2A  
117 receptor, with a strong dependence between subjective efficacy and 2A receptor  
118 affinity <sup>46–49</sup>.

119 However, in the words of Sleight and colleagues, “Linking observed molecular actions  
120 for any particular drug with its clinical effects is an abiding pharmacological problem”  
121 <sup>50</sup>: knowing the primary molecular target is not sufficient to understand a drug’s  
122 effects on brain function, for several reasons. First, given the brain’s intricate, nested  
123 feedback loops and recurrent pathways of connectivity, even a relatively selective  
124 drug can end up influencing unrelated systems beyond what may be apparent from  
125 in vitro studies. Second, most mind-altering compounds are also known to have  
126 affinity for other receptors. Indeed, evidence has been accumulating that multiple  
127 neurotransmitter influences may be involved in both the neural and subjective  
128 experiences induced by many consciousness-altering drugs. In the last year, human  
129 neuroimaging studies identified the involvement of the dopaminergic system in both  
130 propofol-induced anaesthesia <sup>51</sup> and the subjective effects of LSD <sup>52</sup>. More broadly, a  
131 recent large-scale study, combining receptor expression from transcriptomic data  
132 with linguistic processing of several thousand subjective reports of psychedelic use,  
133 identified complex multivariate patterns of association between neurotransmitters  
134 and their effects on the mind elicited by a wide variety of psychedelics, even for  
135 putatively selective agents <sup>53</sup>. At the same time, molecularly different compounds can  
136 exert intriguingly similar effects on both the mind and brain: for instance, LSD and  
137 (sub-anaesthetic) ketamine can produce subjectively similar effects and changes in  
138 terms of structure-function coupling and the complexity of brain activity - despite  
139 acting on different pathways <sup>21</sup>. This suggests both divergent and convergent effects  
140 of different pharmacological agents on the brain’s rich neurotransmitter landscape.

141 Finally, the human brain exhibits rich patterns of anatomical, functional,  
142 cytoarchitectonic, and molecular variations <sup>54–59</sup>. Such patterns also extend to the  
143 regional distribution of different neurotransmitter receptors and transporters, which  
144 vary widely not only in terms of their affinity, time-scales, and downstream effects on

145 neuronal excitability, but also their distribution across regions, layers and neuron  
146 types <sup>27–30</sup>. Therefore, our knowledge of how a drug influences neurotransmission  
147 must take into account the neuroanatomical distribution of its target  
148 neurotransmitters - an essential step towards explaining how different  
149 neurotransmitters mediate the capacity of different drugs to shape the functional and  
150 computational properties of the brain's architecture <sup>27,31</sup>.

151 Here, we sought to address this question in a data-driven way, mapping the  
152 neurotransmitter landscape of drug-induced alterations in the brain's functional  
153 connectivity. To do so, we leveraged two unique datasets: (i) a recently assembled  
154 collection of in vivo maps of regional receptor expression from 18 different receptors,  
155 obtained from PET scanning of over 1200 total subjects, providing the most detailed  
156 information about neuromodulators and their spatial distribution available to date <sup>31</sup>;  
157 and (ii) resting-state functional MRI (rs-fMRI) data acquired under the effects of the  
158 classic psychedelics LSD <sup>60</sup> and ayahuasca <sup>62</sup>; the atypical psychedelic ketamine (at  
159 sub-anaesthetic dose) <sup>63</sup>; the cognitive enhancers modafinil <sup>64</sup> and methylphenidate  
160 <sup>10</sup>; and the anaesthetics sevoflurane <sup>65</sup> and propofol <sup>66,67</sup> (which we compared  
161 against pre-anaesthetic baseline as well as post-anaesthetic recovery); representing  
162 a total of 272 sessions of pharmacological-MRI from 114 distinct subjects and 7  
163 distinct pharmacological agents. Through pharmacologically modulated rs-fMRI, we  
164 can characterise a drug's effects on the brain's spontaneous activity, without the  
165 interference of any specific task <sup>1</sup>.

166 Thus, our goal was to obtain a comprehensive mapping between the cortical  
167 distributions of neurotransmitters and a set of diverse psychoactive pharmacological  
168 agents (covering the range from anaesthetics to psychedelics), in terms of their  
169 effects of functional connectivity. There have been other studies looking at the  
170 relationships between brain changes induced by one or few psychoactive drugs, and  
171 one or few neurotransmitter systems <sup>51,52,68–73</sup>. However, to our knowledge, this is the  
172 largest fMRI study both in terms of the number and variety of psychoactive  
173 pharmacological agents, and the breadth of neurotransmitter systems considered.

174

## 175 Results

176

177 To establish a relationship between neurotransmitter systems and  
178 pharmacologically-induced reorganisation of the brain's functional architecture, we  
179 combine two sets of neuroimaging data, each collected from across multiple studies.  
180 On one hand, we characterise drug-induced functional reorganisation as the  
181 changes in functional connectivity (FC) obtained by contrasting resting-state  
182 functional MRI (rs-fMRI) at baseline and under the acute effect of a psychoactive  
183 drug. We considered the general anaesthetics propofol (two independent datasets)  
184 and sevoflurane; the cognitive enhancers modafinil and methylphenidate; the  
185 "atypical" psychedelic ketamine (at sub-anaesthetic doses); and the classic  
186 psychedelics ayahuasca and lysergic acid diethylamide (LSD) (Figure 1). For each  
187 anaesthetic, we considered two contrasts: drug versus pre-induction baseline, and  
188 drug versus post-anaesthetic recovery.

189

190 On the other hand, we consider the cortical distribution of 14 neurotransmitter  
191 receptors and 4 transporters, obtained from in vivo Positron Emission Tomography  
192 <sup>31</sup>. Overall, 9 neurotransmitter and neuromodulatory systems ("neurotransmitters" for  
193 short) are covered: dopamine (D1 <sup>74</sup>, D2 <sup>75-78</sup>, DAT <sup>79</sup>), norepinephrine (NET <sup>80-83</sup>),  
194 serotonin (5-HT1A <sup>84</sup>, 5-HT1B <sup>84-87,87-89</sup>, 5-HT2A <sup>90</sup>, 5-HT4 <sup>90</sup>, 5-HT6 <sup>91,92</sup>, 5-HTT <sup>90</sup>),  
195 acetylcholine ( $\alpha4\beta2$  <sup>93,94</sup>, M1 <sup>95</sup>, VAcHT <sup>96,97</sup>), glutamate (mGluR5 <sup>98,99</sup>), GABA  
196 (GABA-A <sup>100</sup>), histamine (H3 <sup>101</sup>), cannabinoid (CB1 <sup>102-105</sup>), and opioid (MOR <sup>106</sup>).  
197 (Figure 1). Both rs-fMRI and PET maps were parcellated into 100 functionally  
198 defined regions according to the Schaefer atlas <sup>107</sup>; results for the subcortex and for  
199 a different cortical parcellation (Lausanne-114 <sup>108</sup>) are provided as Supplementary  
200 Information.

201

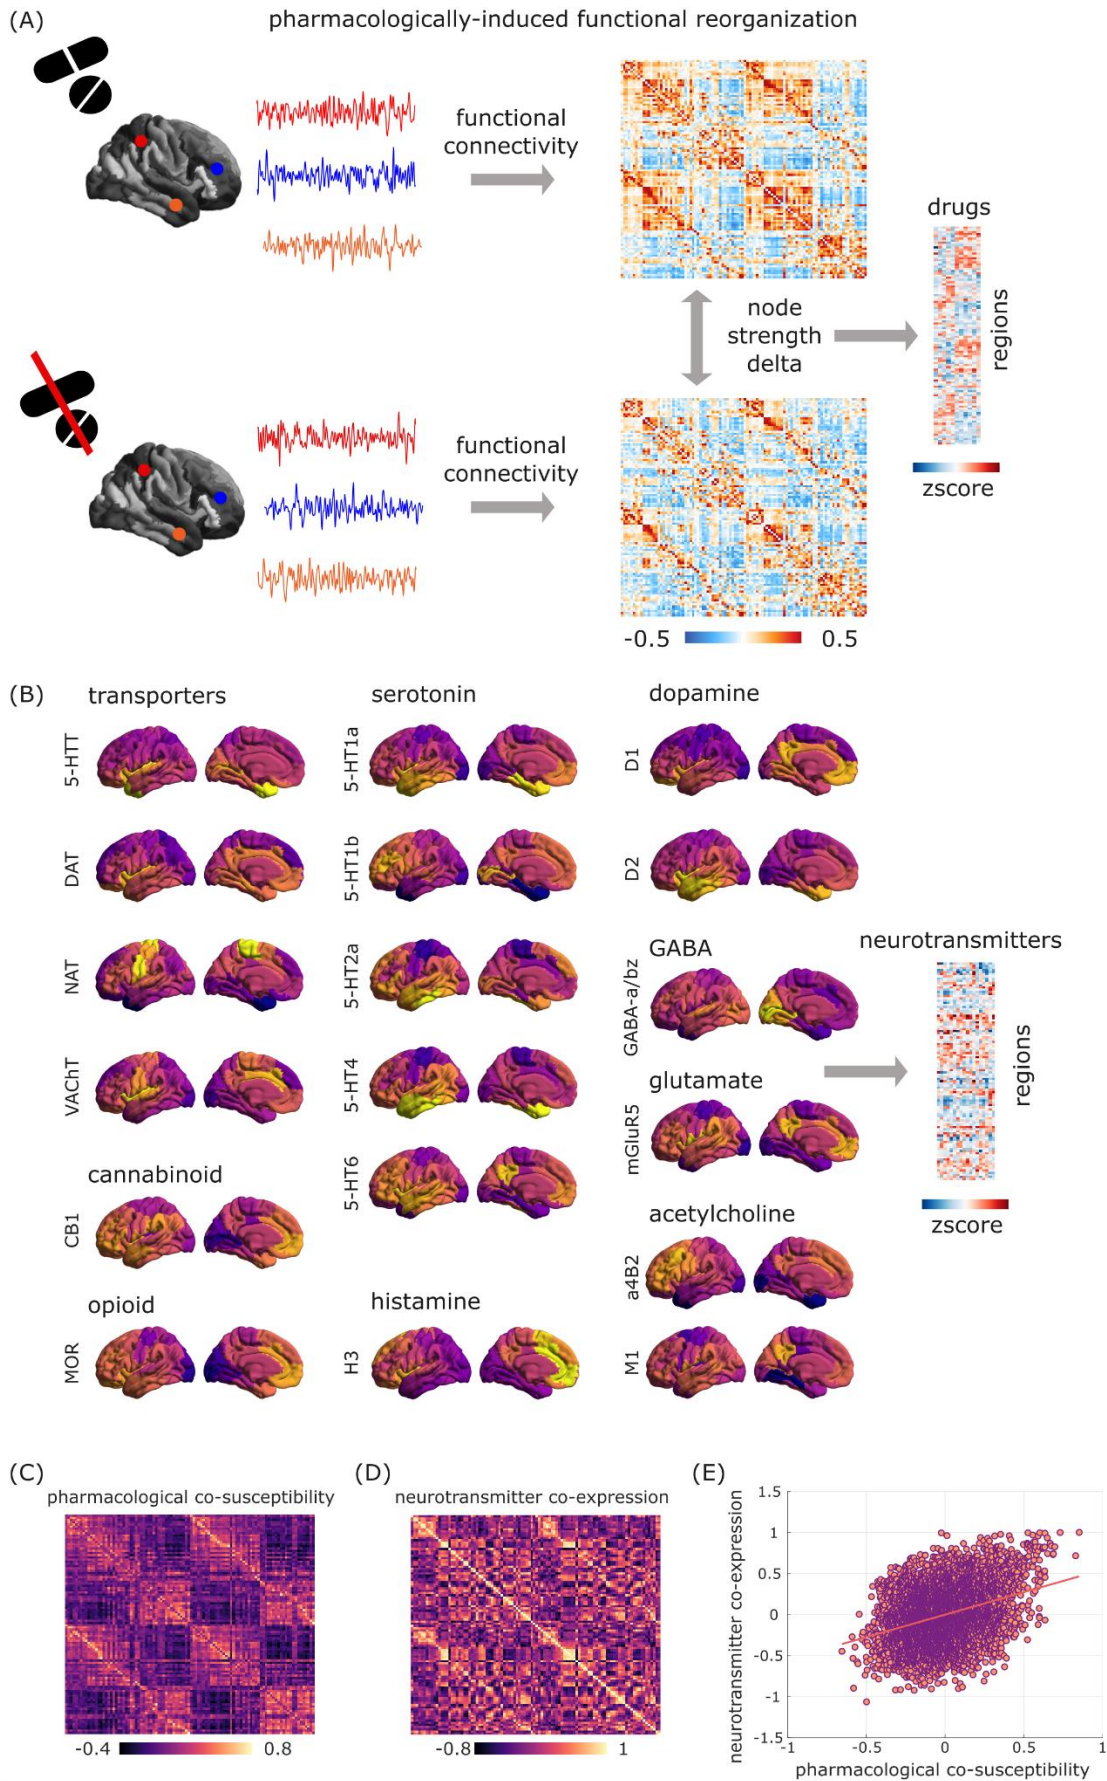

203 **Figure 1. Overview of receptors and pharmacological rs-fMRI data.** (A) For each psychoactive  
204 drug, its pattern of pharmacologically-induced functional reorganisation is quantified as the average  
205 (across subjects) of the within-subject difference in regional FC density between task-free fMRI scans  
206 at baseline and under the drug's effects. The result is a map of 100 cortical regions by 11 drug-related  
207 contrasts. (B) Neurotransmitter systems are mapped with Positron Emission Tomography with  
208 radioligands for 14 receptors and 4 transporters, resulting in a map of 100 cortical regions by 18  
209 neurotransmitters. Correlating each of these sets of maps against itself yields two region-by-region  
210 matrices of pharmacological co-susceptibility (C) and neurotransmitter co-expression (D),  
211 respectively, which are significantly correlated even after removing the exponential relationship with  
212 Euclidean distance between regions (E).

213

## 214 Brain regions with shared chemoarchitecture also respond 215 similarly across pharmacological perturbations

216

217 Receptors and transporters shape the way that neurons respond to  
218 neurotransmission and neuromodulatory influences. In turn, psychoactive drugs  
219 exert their effects (primarily) by acting on neurotransmitters and neuromodulators.  
220 Therefore, we reasoned that everything else being equal, regions that express  
221 similar patterns of receptors and transporters should exhibit similar patterns of  
222 susceptibility to drug-induced functional reorganisation.

223

224 To address this question, we computed matrices of pharmacological co-susceptibility  
225 and neurotransmitter co-expression between pairs of regions, by correlating  
226 respectively the regional patterns of drug-induced FC changes (across all subjects),  
227 and the regional patterns of neurotransmitter expression across all 18 receptor and  
228 transporter PET maps. To account for spatial autocorrelation in molecular and FC  
229 attributes, we regressed out from both matrices the exponential trend with Euclidean  
230 distance<sup>109–112</sup>.

231

232 Supporting our hypothesis, we found that pharmacological co-susceptibility is  
233 significantly correlated with neurotransmitter profile similarity: the extent to which two  
234 regions' FC patterns are similarly affected by perturbations induced by different  
235 psychoactive drugs, is predicted by the extent to which they co-express  
236 neurotransmitter receptors and transporters:  $\rho = 0.26$ ,  $p < 0.001$  after regressing  
237 out the effects of Euclidean distance (Figure 1). In other words, regions that exhibit  
238 shared chemoarchitecture also respond similarly across pharmacological  
239 perturbations.



240

## 241 Multivariate Receptor-Drug Associations

242

243 The previous analysis revealed of a relationship between large-scale patterns of  
244 neurotransmitter expression and large-scale patterns of functional susceptibility to  
245 pharmacological perturbations - complementing previous work that identified  
246 relationships between individual drugs and individual receptors. However, neither of  
247 these two approaches captures the full richness of the two datasets employed here.  
248 To obtain a synthesis between these two approaches, we employed a multivariate  
249 association technique, Partial Least Squares correlation (PLS, also known as  
250 Projection to Latent Structures <sup>113,114</sup>), which enabled us to identify multivariate  
251 patterns of maximum covariance between drug-induced effects on functional  
252 connectivity, and the cortical distributions of neurotransmitter expression <sup>115,116</sup>.

253

254 This analysis indicated the presence of two statistically significant latent variables  
255 (linear weighted combinations of the original variables) relating pharmacologically-  
256 induced functional reorganisation to neurotransmitter profiles. Significance was  
257 assessed against autocorrelation-preserving spin-based null models, embodying the  
258 null hypothesis that drug effects and neurotransmitters are spatially correlated with  
259 each other purely because of inherent spatial autocorrelation <sup>117-120</sup> (Figure 2). We  
260 further cross-validated this result using a distance-dependent method; out-of-sample  
261  $r = 0.40$  for PLS1 and  $0.59$  for PLS2, both  $p < 0.001$  from t-test against spin-based  
262 null distributions) (Figure S1).

263

264

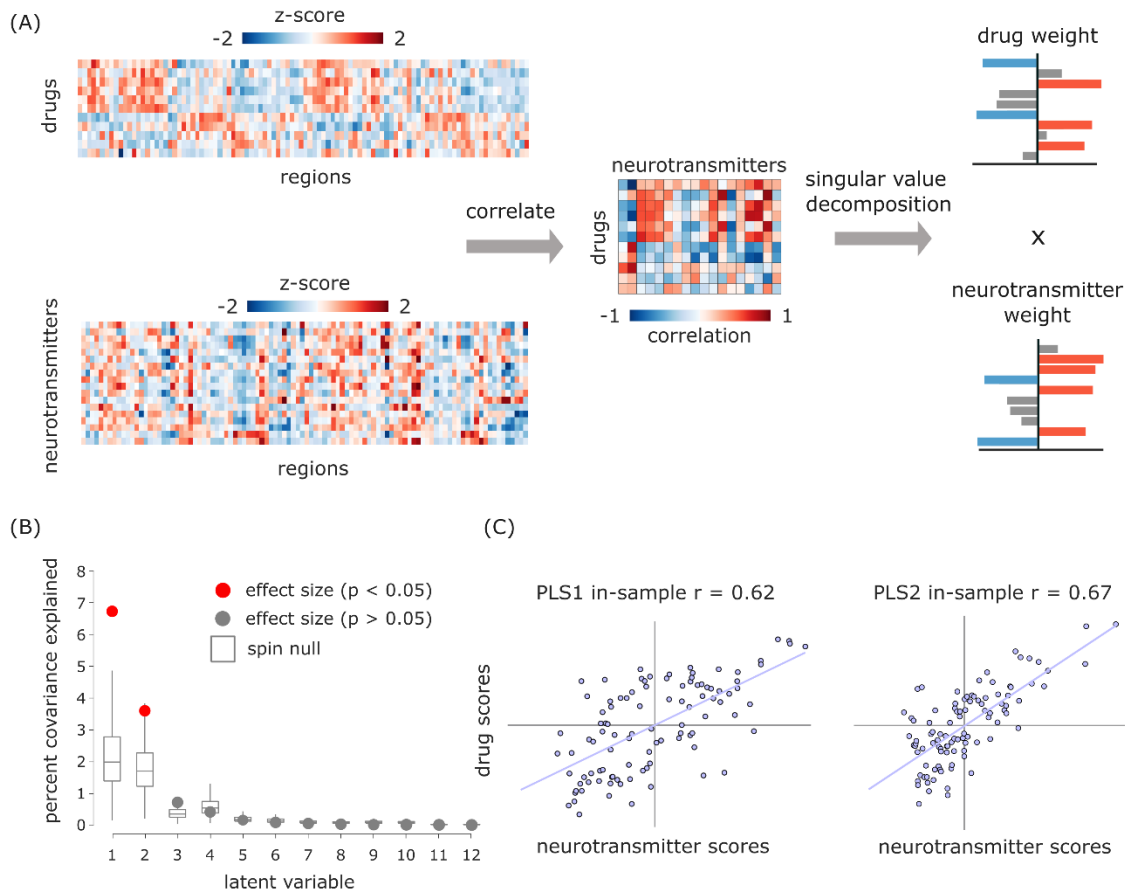

265

266 **Figure 2. PLS analysis reveals spatially covarying patterns of pharmacologically-induced**  
267 **functional reorganisation and neurotransmitter expression.** (A) PLS analysis relates two data  
268 domains by correlating the variables across brain regions and subjecting this to singular value  
269 decomposition. This results in multiple latent variables: linear weighted combinations of the original  
270 variables (neurotransmitter weights and drug weights) that maximally covary with each other. (B)  
271 Latent variables are ordered according to effect size (the proportion of covariance explained between  
272 neurotransmitter expression and drug-induced functional reorganisation they account for) and shown  
273 as red dots. (C) The first two latent variables (PLS1 and PLS2) were statistically significant, with  
274 respect to the spatial autocorrelation-preserving null model shown in grey (10,000 repetitions).  
275 Neurotransmitter (drug) scores are defined as the projection of the original neurotransmitter density  
276 (drug-induced FC changes) matrix onto the neurotransmitter (drug) weights, such that each brain  
277 region is associated with a neurotransmitter and drug score. By design, neurotransmitter and drug  
278 scores correlate highly.

279

280

281 For each latent variable, each brain region is associated with a neurotransmitter and  
282 drug score. In turn, neurotransmitter (drug) loadings are defined as the correlation  
283 between the PLS-derived score pattern and each neurotransmitter's density of  
284 expression (resp., drug-induced FC changes) across brain regions. Taking into  
285 account the first latent variable (PLS1), drug loadings showed a distinction of  
286 pharmacological effects into two groups, with anaesthetics on one end, and

287 psychedelics and cognitive enhancers on the other. Neurotransmitter loadings  
288 divided the receptors from transporters: at the positive end (orange), the  
289 acetylcholine and noradrenaline transporters (with the serotonin and dopamine  
290 transporters immediately following, but including zero in their 95% CI); all receptors  
291 were instead at the negative end (blue), although some included zero in their CI  
292 (Figure 3).

293

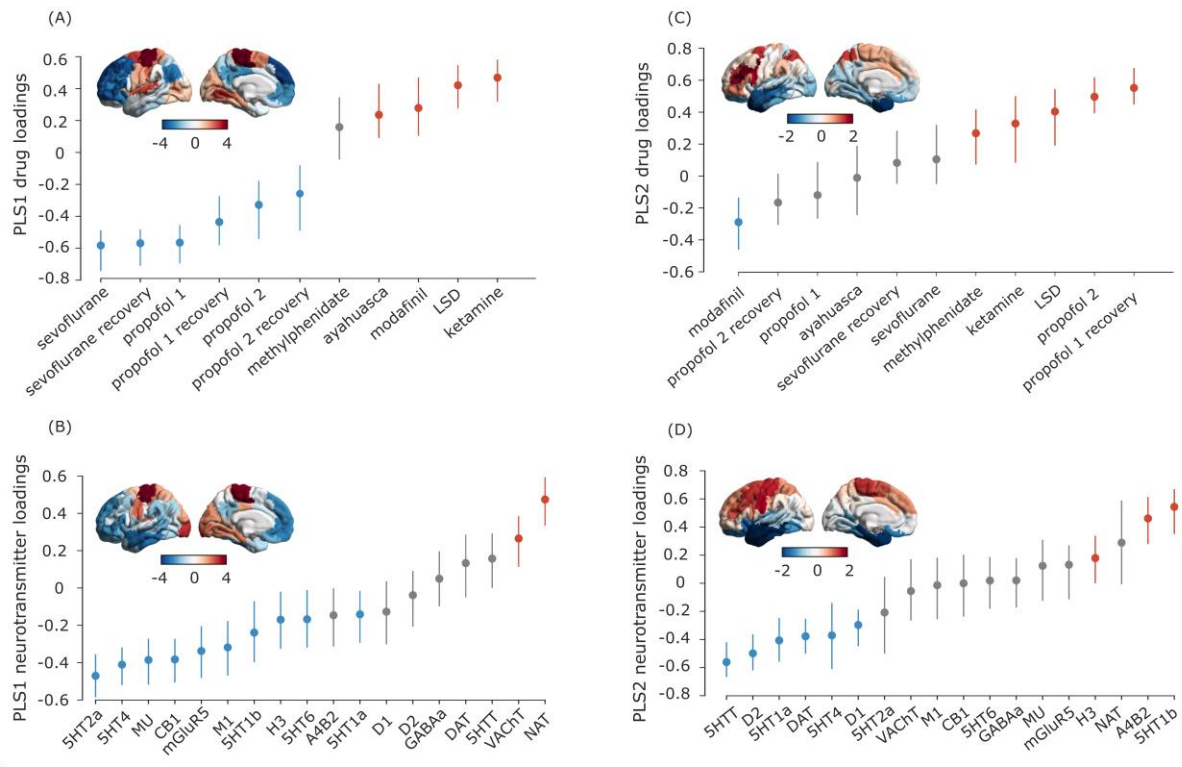

294

295 **Figure 3. PLS scores and loadings from significant latent variables.** (A-B) Scores and loadings  
296 for PLS1. (C-D) scores and loadings for PLS2. Brain plots: Drug scores (top row) and  
297 neurotransmitter scores (bottom row) for each brain region are obtained by projecting the original  
298 neurotransmitter and drug data back onto the PLS analysis-defined drug/neurotransmitter weights,  
299 indexing the extent to which a brain region expresses covarying drug/ neurotransmitter patterns. In  
300 turn, neurotransmitter (drug) loadings are defined as the Pearson's correlation between each  
301 neurotransmitter's density of expression (drug-induced FC changes) across brain regions and the  
302 PLS analysis-derived score pattern. Error bars indicate 95% confidence interval, and colour indicates  
303 direction of the effect: positive (orange), negative (blue), or null (grey). Same-coloured loadings and  
304 scores co-vary positively, whereas opposite-coloured drugs and scores co-vary negatively.

305

306

307 Pertaining to the second latent variable (PLS2), neurotransmitter loadings largely set  
308 apart the monoamines dopamine and serotonin (except 5HT-1b) on one end, from  
309 the other neurotransmitters on the other end. However, the drug loadings were less

310 clearly discernible, with propofol at both ends. Both neurotransmitter and drug scores  
311 markedly separated dorsal and ventral aspects of the brain for this second latent  
312 variable (Figure 3).

313

## 314 Pharmacologically-induced alterations align with functional, 315 anatomical and molecular hierarchies

316

317 Neurotransmitter and drug scores (whose spatial similarity PLS is designed to  
318 maximise) provide information about the regional distribution of neurotransmitter-  
319 drug associations. Neurotransmitters and drugs whose activity correlates positively  
320 with the score pattern covary with one another in the positively scored regions, and  
321 vice versa for negatively scored regions.

322

323 PLS1 scores correspond to the main axis of covariance between neurotransmitter  
324 expression and pharmacologically-induced functional reorganisation. For both drug  
325 and receptor scores, we observed that their regional distribution reflected the brain's  
326 organisation into intrinsic resting-state networks (RSNs) <sup>121</sup>, setting apart visual and  
327 somatomotor cortices from association cortices (Figure 3,4). It is possible that the  
328 correspondence of PLS1 scores with RSNs may be in part driven by the fact that  
329 these networks are predicated in terms of functional neuroimaging, which we also  
330 used to characterise drug-induced functional reorganisation in our data. Therefore,  
331 we next sought to determine whether our data-driven topographic patterns reflect  
332 other cortical gradients of variation in terms of functional, anatomical, and molecular  
333 attributes. To this end, we considered intracortical myelination obtained from  
334 T1w/T2w MRI ratio <sup>58</sup>; evolutionary cortical expansion obtained by comparing human  
335 and macaque <sup>122</sup>; the principal component of variation in gene expression from the  
336 Allen Human Brain Atlas transcriptomic database ("AHBA PC1") <sup>59,123</sup>; the principal  
337 component of variation in task activation from the NeuroSynth database  
338 ("NeuroSynth PC1") <sup>59,124</sup>; and the principal gradient of functional connectivity <sup>57</sup>.  
339 Since pharmacological interventions exert their effects on the brain via the  
340 bloodstream, we also included a map of cerebral blood flow <sup>54</sup>. Finally, we included a  
341 recently derived gradient of regional prevalence of different kinds of information, from  
342 redundancy to synergy <sup>125</sup>.

343

344 We observed significant correlations (assessed against spin-based null models)  
345 between each cortical hierarchy and both neurotransmitter and drug scores for PLS1  
346 (note that the myelin and AHBA PC1 maps are reversed with respect to the  
347 remaining hierarchies) (Figure 4). We also repeated this analysis for each of the  
348 individual patterns of pharmacologically-induced functional reorganisation (Figure  
349 S2). Even after FDR correction for multiple comparisons, each hierarchical gradient  
350 was correlated with multiple patterns of pharmacologically-induced reorganisation,  
351 and each drug (except methylphenidate) was correlated with multiple hierarchical  
352 gradients. Once again, all anaesthetics exhibited similar patterns, opposite to the  
353 pattern of correlations displayed by modafinil and the psychedelics ketamine, LSD  
354 and ayahuasca. The only exception was methylphenidate, which exhibited no  
355 significant correlations (Figure S2).

356

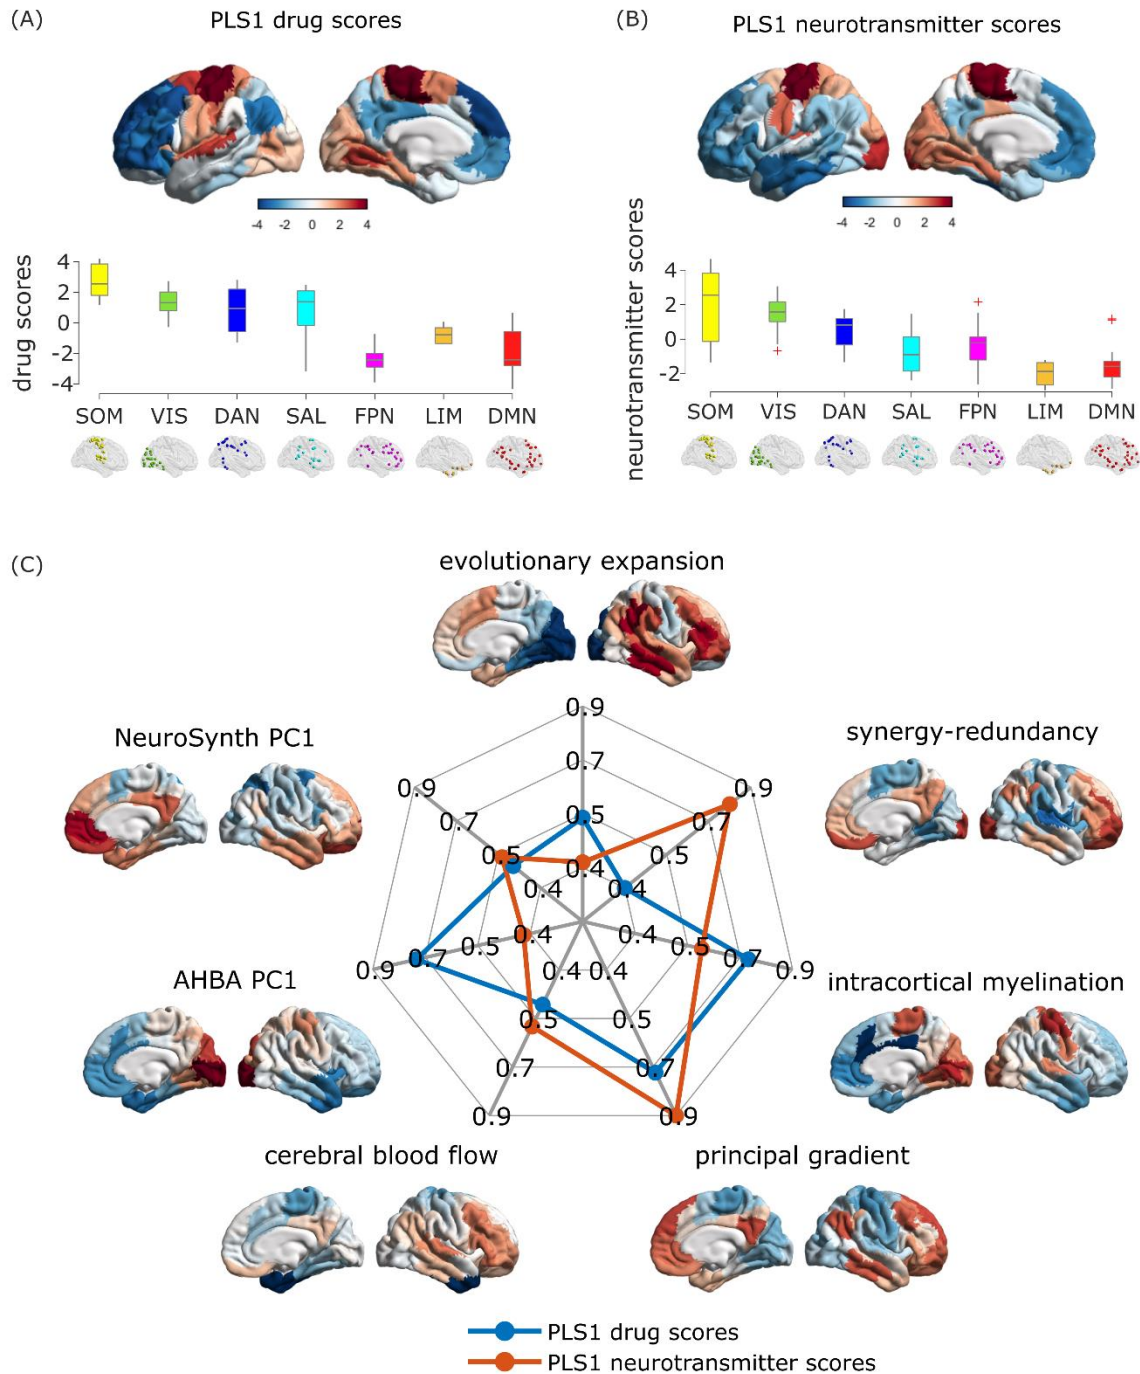

357

358 **Figure 4. Correspondence between the principal axis of drug-neurotransmitter scores and**  
 359 **functional, anatomical and molecular hierarchies.** (A-B) Cortical distribution of drug and  
 360 neurotransmitter scores for PLS1, and their association with intrinsic resting-state networks. (C)  
 361 Radial plot represents the absolute value of the correlation between PLS1 drug and neurotransmitter  
 362 scores, and each of seven cortical hierarchies obtained from different neuroimaging modalities. The  
 363 magnitude of each correlation was statistically significant, as assessed against spin-based null  
 364 models with preserved spatial autocorrelation.

365

366

367 The scores for PLS2 instead identified a ventral-dorsal pattern of regional variation  
368 (Figure 3 and Figure S3), which did not significantly correlate with any of the  
369 canonical gradients of hierarchical organisation (all  $p > 0.05$  against spin-based null  
370 models).

371

## 372 Neurotransmitter landscape of pharmacologically-induced 373 functional reorganisation

374

375 Taking into account the first two PLS latent variables shows how each drug-specific  
376 pattern of pharmacologically-induced functional reorganisation can be interpreted in  
377 terms of contributions from different receptors (note that sign is arbitrary) (Figure 5).  
378 As already shown in Figure 3, the first latent variable revealed a stark division  
379 between transporters and receptors, which discriminates between anaesthetics and  
380 other psychoactive substances. In terms of pharmacological alterations, the non-  
381 monoaminergic end of the second latent variable loaded onto drugs with relatively  
382 stronger effects on subjective experiences (the higher doses of anaesthetic, and the  
383 hallucinogenic psychedelics). However, methylphenidate also loaded onto this end of  
384 the second latent variable. Altogether, we find that the first latent variable captures a  
385 strong relationship between drug interventions and receptor systems that is both  
386 biologically relevant and aligns with the functional organisation of the brain.

387

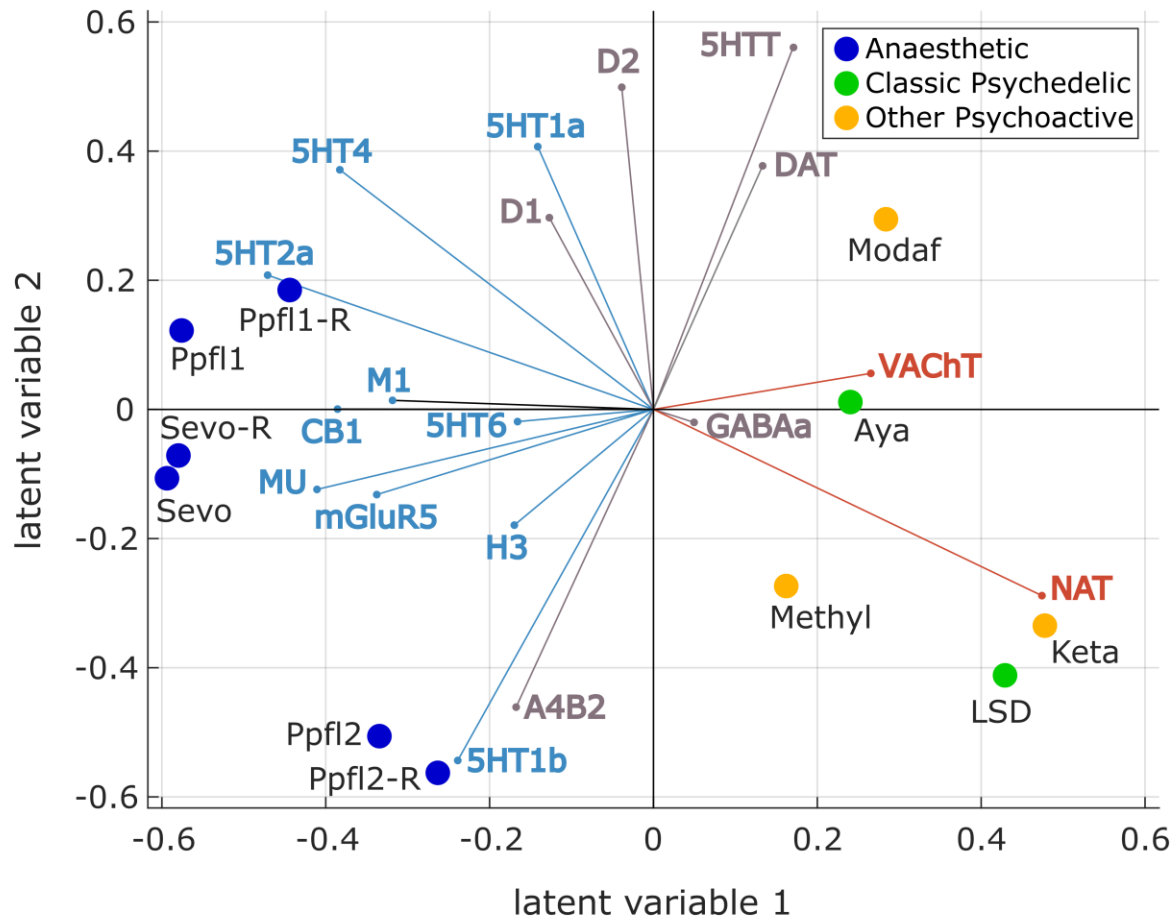

388

389 **Figure 5. Biplot of neurotransmitters and pharmacological agents.** Each drug is represented as a  
390 point reflecting its projection onto the first two latent variables of the PLS analysis, color-coded based  
391 on its effects on subjective experience (anaesthetic, psychedelic, or cognitive enhancer). Each  
392 neurotransmitter receptor and transporter is represented as a vector in the same 2D space, color-  
393 coded by loading onto PLS1 as shown in Figure 3 (orange for positive; blue for negative; and grey if  
394 the 95% CI intersects zero).

395

## 396 Co-susceptibility to pharmacological and pathological 397 alterations

398 Finally, we wondered if the functional co-susceptibility of different regions to transient  
399 pharmacological perturbations may provide a functional proxy for their co-  
400 susceptibility to structural perturbations resulting from different neurological,  
401 neurodevelopmental, and psychiatric disorders. To this end, we combined 11 spatial  
402 maps of cortical thickness abnormalities made available by the Enhancing Neuro  
403 Imaging Genetics Through Meta Analysis (ENIGMA) consortium <sup>126</sup>: 22q11.2  
404 deletion syndrome (22q) <sup>127</sup>, attention-deficit/hyperactivity disorder (ADHD) <sup>128</sup>,  
405 autism spectrum disorder (ASD) <sup>129</sup>, idiopathic generalized epilepsy <sup>130</sup>, right



406 temporal lobe epilepsy <sup>130</sup>, left temporal lobe epilepsy <sup>130</sup>, depression <sup>131</sup>, obsessive-  
407 compulsive disorder (OCD) <sup>132</sup>, schizophrenia <sup>133</sup>, bipolar disorder (BD) <sup>134</sup>, and  
408 Parkinson's disease (PD) <sup>135</sup>. For simplicity, we refer to diseases, disorders, and  
409 conditions as "disorders" throughout the text. The cortical abnormality maps  
410 summarise contrasts between over 21,000 adult patients and 26,000 controls,  
411 collected following identical processing protocols to ensure maximal comparability  
412 <sup>126</sup>.

413

414 Following the same procedure used to obtain the region x region matrices of  
415 pharmacological co-susceptibility and neurotransmitter co-expression in Figure 1, we  
416 obtained a region x region matrix of co-susceptibility to disorder-induced cortical  
417 abnormality by correlating the regional patterns of cortical abnormality across all 11  
418 disorders <sup>109</sup> (Figure 6A,B). Correlating this matrix of regional co-susceptibility to  
419 disease-associated perturbations against the previously derived matrix of regional  
420 co-susceptibility to pharmacological perturbations, we found a statistically significant  
421 relationship (Spearman's  $\rho = 0.29$ ,  $p < 0.001$  after regressing out the effect of  
422 Euclidean distance) (Figure 6C). This result goes beyond a recent demonstration  
423 that molecular similarity and disorder similarity are correlated <sup>109</sup>, by showing that a  
424 correlation also exists between different kinds of perturbations: anatomical and  
425 pharmacological.

426

427 This observation suggests that there may be common patterns of regional co-  
428 susceptibility to perturbations, whether structural or functional. To explore this  
429 possibility explicitly, we resorted to a non-linear dimensionality reduction algorithm,  
430 diffusion map embedding, to obtain joint gradients of variation from pharmacological  
431 and disease-associated co-susceptibility using a recently developed method for  
432 network fusion <sup>136</sup>. We found that the main axis of variation in regional joint  
433 susceptibility to pharmacological and neuropsychiatric alterations corresponds to the  
434 well-known principal gradient of functional connectivity <sup>57</sup>, setting apart unimodal  
435 from transmodal cortices, reminiscent of the PLS1 scores (Figure 6D). The second  
436 gradient instead sets apart dorsal and ventral parts of the brain, reminiscent of the  
437 PLS2 scores (Figure 6E). Together, these two gradients account for nearly half of  
438 the variation in regional co-susceptibility (Figure 6F).

439

440 When applying diffusion map embedding to the matrix of pharmacological co-  
441 susceptibility only, we found that the first two gradients of variation in regional  
442 pharmacological susceptibility coincide with the two principal gradients of functional  
443 connectivity of Margulies et al <sup>57</sup> (Figure S4): the first gradient sets apart unimodal  
444 from transmodal cortices, coinciding with the first gradient of joint susceptibility,  
445 whereas the second gradient is anchored in visual cortex at one end, and  
446 somatomotor cortex at the other end (Figure S4). This observation suggests that co-  
447 susceptibility to pharmacological perturbations recapitulates intrinsic functional  
448 architecture, as well as the co-susceptibility to disorder-induced structural  
449 perturbations.

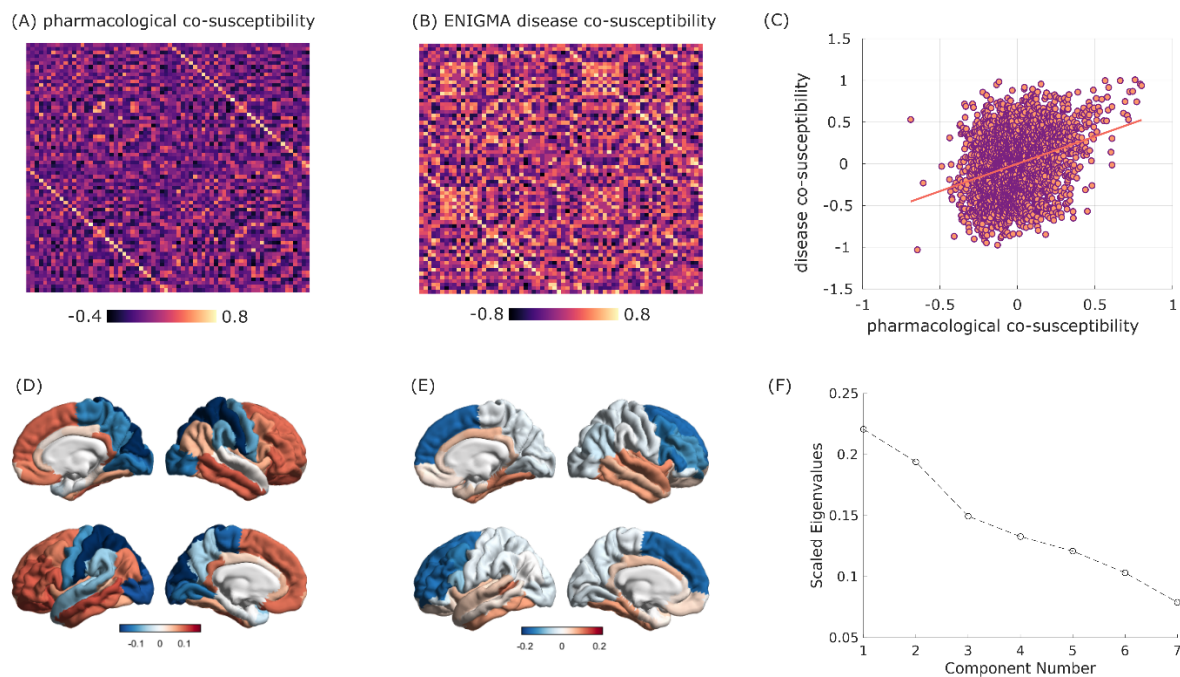

450 **Figure 6. Co-susceptibility to pharmacological and pathological alterations.** Brain regions that  
451 are similarly affected by pharmacology, in terms of functional reorganisation (A) are also similarly  
452 affected across disorders (B), in terms of cortical thickness abnormalities. This relationship persists  
453 after regressing out the exponential trend with Euclidean distance (C). (D-E) First two principal  
454 gradients of regional joint susceptibility to pharmacological and neuropsychiatric and neurological  
455 alterations. (F) Scree plot of the scaled eigenvalues from diffusion map embedding versus number of  
456 components.  
457

458  
459

## 460 Discussion

461

462 Here, we characterised how mind-altering pharmacological agents engage the  
463 brain's rich neurotransmitter landscape to exert their effects on brain function. We  
464 mapped the functional chemoarchitecture of the human brain, by developing a  
465 computational framework to relate the regional reorganisation of fMRI functional  
466 connectivity induced by 8 different mind-altering drugs, and the cortical distribution of  
467 18 neurotransmitter receptors and transporters obtained from PET <sup>31</sup>. This approach  
468 allowed us to discover large-scale spatial gradients relating pharmacologically-  
469 induced changes in functional connectivity to the underlying neurotransmitter  
470 systems. By relating microscale molecular chemoarchitecture and macroscale  
471 functional reorganisation induced by drugs with potent acute effects on the mind, our  
472 results provide a first step to bridge molecular mechanisms and their effects on  
473 subjective experience, cognition, and behaviour, via their effects on the brain's  
474 functional architecture.

475

476 Using our computational framework, we found that psychoactive drugs are best  
477 understood in terms of contributions from multiple neurotransmitter systems. We also  
478 found that anaesthetics and psychedelics/cognitive enhancers are largely opposite in  
479 terms of their association with neurotransmitters in the cortex. Remarkably, the  
480 effects of both anaesthetics and psychedelics/cognitive enhancers on brain function,  
481 though opposite, are both topographically organised along multiple hierarchical  
482 gradients of brain function, anatomy, and neurobiology. Finally, we found that co-  
483 susceptibility to pharmacological perturbations recapitulates co-susceptibility to  
484 disorder-induced structural perturbations.

485

486 Many of the drugs considered here are known to have varied molecular targets,  
487 beyond the primary ones through which they exert their effects. The present results  
488 add another dimension to recent work employing a similar multivariate approach to  
489 relate gene expression of receptors with subjective reports of psychedelic  
490 experiences, which also found widespread involvement of multiple receptors <sup>53</sup>. In  
491 addition, all the drugs we considered here have profound effects on the mind after a  
492 single acute dose, from cognitive enhancement to hallucinations to the suppression

493 of consciousness altogether. Such far-reaching effects are accompanied by  
494 sometimes drastic repercussions on brain function and dynamics: it stands to reason  
495 that such widespread reorganisation would not leave many neurotransmitter  
496 pathways unaffected - even those that are not directly involved in generating the  
497 altered state in question.

498

499 The opposite characterisation of psychedelics and anaesthetics is aligned with their  
500 respective effects on the complexity of brain activity and connectivity, which is  
501 reduced by anaesthesia but increased by LSD, ayahuasca and ketamine, as well as  
502 other psychedelics <sup>18,21,23,62,137–147</sup>. Similarly, psychedelics (including sub-anaesthetic  
503 ketamine) and anaesthetics were recently shown to exert opposite effects on  
504 structure-function coupling: whereas anaesthesia increases the dependence of brain  
505 activity on the underlying structural network, LSD, psilocybin, and sub-anaesthetic  
506 ketamine induce fMRI BOLD signals that are increasingly liberal with respect to the  
507 underlying structural network organisation <sup>21</sup>.

508

509 The main division we observed in terms of neurotransmitters is between receptors  
510 and transporters, which displayed opposite associations with drug-induced effects.  
511 Specifically pertaining to PLS1, we found that transporters covary with cognitive  
512 enhancers and psychedelics in primary sensory and motor regions, whereas  
513 receptors covary with anaesthetics in transmodal association cortices. Hierarchical  
514 organisation of pharmacologically-induced functional reorganisation stands to reason  
515 based on prior evidence: both psychedelics and GABA-ergic anaesthetics have been  
516 shown to have potent effects on the activity and connectivity of higher-order  
517 association cortices, and the default mode network in particular <sup>18,60,61,65,148–151</sup>. In  
518 addition, serotonergic psychedelics also exert powerful influences on the visual  
519 cortex at the other end of the cortical hierarchy <sup>60</sup>, and as a result they have been  
520 shown to induce a “flattening” of the principal gradient of functional connectivity <sup>152</sup>.

521

522 Having established that the effects of mind-altering drugs are hierarchically  
523 organised, the question then becomes: why should mind-altering drugs exert their  
524 effects in such a hierarchically organised fashion? Multiple aspects of neuroanatomy  
525 may contribute to this effect. First, the principal component of variation of receptor  
526 expression is itself organised along the brain’s sensory-to-association hierarchical

527 axis <sup>27</sup> - and so is, for instance, the distribution of the serotonin 2A receptor, the main  
528 direct target of serotonergic psychedelics <sup>31</sup>. Second, transmodal cortices are  
529 characterised by increased excitability <sup>153</sup> and a predominance of feedback efferent  
530 connections <sup>27</sup>: combined with their high diversity of receptor expression across  
531 layers <sup>27</sup>, these regions may be especially susceptible to receive and amplify multiple  
532 pharmacological influences.

533

534 Third, we observed that for most drugs, pharmacologically-induced changes in  
535 functional connectivity correlate with the map of regional cerebral blood flow; since  
536 ultimately the bloodstream is how drugs reach their regional molecular targets,  
537 greater cerebral blood flow in transmodal cortices may facilitate especially high  
538 availability of the drug in these regions (although it should be noted that some drugs  
539 can also have effects on heart rate and neuro-vascular coupling). Finally, regions of  
540 transmodal cortex have high neuron density <sup>154</sup> and tend to have numerous, far-  
541 reaching, and diversely distributed anatomical connections with the rest of the brain  
542 <sup>155</sup>, so that any effects that are exerted there may quickly reverberate throughout the  
543 whole cortex.

544

545 To summarise, we conjecture that the hierarchical organisation of pharmacologically-  
546 induced changes in FC may be explained as follows: transmodal association cortices  
547 are especially diverse in their receptor profiles, and rich in some key receptors; in  
548 addition to being more susceptible to pharmacological intervention due to higher  
549 expression of receptors, blood flow is poised to bring greater amounts of drug to  
550 these very cortices; and once these cortices' activity is perturbed, the perturbation  
551 can reverberate widely, thanks to their widespread connectivity. Of course, the drugs  
552 we included were chosen precisely because of their powerful effects on cognition  
553 and subjective experience, so it stands to reason that their effects should align with  
554 the division between primary and higher-order cortices (which also aligns with the  
555 principal component of variation obtained from NeuroSynth term-based meta-  
556 analysis). In other words, drugs whose effects on functional connectivity are less  
557 selective for higher versus lower ends of the cortical hierarchy may simply be less  
558 likely to exert mind-altering effects of the kind that we chose to focus on in this work.

559

560 More broadly, we found that pairs of regions that are more similar in terms of their  
561 susceptibility to pharmacologically-induced FC changes, are also more similar in  
562 their susceptibility to cortical alterations associated with a variety of neuropsychiatric  
563 disorders. This observation suggests a broader pattern of both (acute)  
564 pharmacological and (chronic) neuroanatomical susceptibility across regions. We  
565 found that this joint vulnerability can be understood in terms of two multimodal  
566 principal gradients of variation over the cortex: one of them resembling the principal  
567 gradient of functional connectivity (and principal latent variable of neurotransmitter-  
568 drug association), and the other anchored in dorsal prefrontal cortex at one end, and  
569 temporal cortex at the other. The association between disorder co-susceptibility and  
570 co-susceptibility to pharmacologically-induced functional reorganisation sheds new  
571 light on recent evidence that the principal gradient of neurotransmitter expression is  
572 particularly relevant for predicting a wide spectrum of disease-specific cortical  
573 morphology <sup>109</sup>, by showing that this observation extends to the effects of engaging  
574 different receptors. This interpretation is further supported by our own evidence that  
575 pharmacological perturbations are shaped by neurotransmitter co-expression.

576

577 The results reported here open new possibilities for data-driven, multivariate  
578 mapping between the brain's high-dimensional neurotransmitter landscape and the  
579 effects of potent pharmacological interventions on the brain's functional architecture.  
580 Crucially, neuropsychiatric disorders and candidate pharmacological treatments for  
581 them ultimately need to exert their effects on cognition and behaviour by influencing  
582 brain function. In this light, it is intriguing that susceptibility to disorder-related cortical  
583 abnormalities correlates with susceptibility to pharmacological intervention. This  
584 observation suggests that regions that are structurally most vulnerable to disease  
585 (which presumably in turn shapes their functional architecture) may also be the ones  
586 that are most susceptible to re-balancing of their functional organisation by an  
587 appropriate choice of pharmacological intervention. This work represents the  
588 necessary first step towards identifying novel and perhaps unexpected associations  
589 between drugs and neurotransmitters, as well as elucidating the known ones in a  
590 data-driven manner.

## 591 Limitations and future directions

592 Although the main strength of our study is our extensive coverage of both  
593 neurotransmitters and pharmacological data, it is important to acknowledge that  
594 neither is complete: in particular, our sample did by no means exhaustively include  
595 all mind-altering drugs that have been studied: prominent additions for future work  
596 may include psilocybin, DMT (as separate from the other components of the  
597 ayahuasca infusion)<sup>156,157</sup>, the kappa opioid receptor agonist salvinorin-A<sup>158</sup>, the  
598 alpha-2 receptor agonist dexmedetomidine<sup>159–161</sup>, and anaesthetic doses of  
599 ketamine<sup>24,148,162</sup>, just to name a few that have been recently studied - but also  
600 alcohol or caffeine, arguably the two most widely used psychoactive substances.

601  
602 We also acknowledge that the pharmacological datasets included here come from  
603 limited samples that have been studied before, and replication in different datasets  
604 with the same drugs (as we have done for propofol) would also be auspicious -  
605 especially for the methylphenidate dataset, which unlike all our other data, comes  
606 from TBI patients rather than healthy controls<sup>10</sup>. Although we have endeavoured to  
607 mitigate scanner and acquisition differences by using a within-subject design and re-  
608 preprocessing all data with the same pipeline, nevertheless we cannot exclude some  
609 residual influence of such differences on our results (e.g., eyes open versus closed;  
610 the ayahuasca data were acquired at a lower field strength of 1.5T; the sevoflurane  
611 and modafinil data were acquired at higher temporal resolution, with TR = 1.83s and  
612 1.671s, respectively). Similar considerations about the differences between datasets  
613 apply for the PET data, as discussed in detail in the original publication collecting the  
614 PET maps<sup>31</sup>. Likewise, the coverage of neurotransmitter receptors and transporters,  
615 though the most extensive available to date, is far from exhaustive. The same  
616 limitation also applies to the ENIGMA disorder data<sup>126</sup>: many more disorders,  
617 diseases, and conditions exist than the ones considered here. And although the  
618 ENIGMA consortium provides datasets from large samples with standardised  
619 pipelines, ensuring robust results, the patient populations may exhibit co-morbidities  
620 and/or be undergoing treatment. In addition, the available maps do not directly reflect  
621 changes in tissue volume, but rather the effect size of patient-control statistical  
622 comparisons, in terms of only one low resolution cortical-only parcellation.

623

624 In addition to the inevitable limitations of analysing large-scale datasets from multiple  
625 sites, there are also limitations of our analytic framework. Although we report a  
626 macroscale spatial association between neurotransmitter expression and  
627 pharmacologically-induced functional reorganisation that is statistically unexpected  
628 based on autocorrelation alone, caution is warranted when drawing inferences from  
629 statistical results to the underlying biology. We used linear models that assume  
630 independence between observations - an assumption that mostly does not hold in  
631 the brain, given the possibility of nonlinear effects in how drugs exert their effects on  
632 the brain's intricately connected neurotransmitter systems. To mitigate this limitation,  
633 throughout this work we triangulated towards a robust statistical mapping between  
634 neurotransmitters and drugs by combining cross-validation and conservative null  
635 models that account for the spatial dependencies between regions <sup>59</sup>.

636

637 Another limitation is that, due to data availability and well documented differences in  
638 PET radioligand uptake between cortical and subcortical structures <sup>31,163,164</sup>, our work  
639 was mainly restricted to the cortex. The thalamus, brainstem, and other subcortical  
640 structures are prominently involved in mediating cortico-cortical interactions and the  
641 effects of both psychedelics, anaesthetics, and cognitive enhancers <sup>16,18,51,65,159,165–</sup>  
642 <sup>170</sup>. Although we did perform a separate PLS analysis on the subcortex (Fig. S6), we  
643 expect that future work combining these approaches through suitable data (and  
644 including cerebellum and brainstem) will provide richer insights than the sum of their  
645 individual contributions.

646

647 More broadly, the other main limitation of this work is its correlational nature:  
648 receptors and drugs were mapped in separate cohorts of individuals, and identifying  
649 spatially correlated patterns does not guarantee the causal involvement of the  
650 neurotransmitters in question. Experimental interventions will be required to  
651 conclusively demonstrate causal involvement, and elucidate the underlying  
652 neurobiological pathways. However, we emphasise that our results generate  
653 empirically testable hypotheses about which neurotransmitters may be involved with  
654 the macroscale effects of different drugs on brain function. Such hypotheses may be  
655 tested experimentally, but also *in silico*: whole-brain computational modelling is  
656 becoming increasingly prominent as a tool to investigate the causal mechanisms that  
657 drive brain activity and organisation in healthy and pathological conditions <sup>171–174</sup>.



658 Crucially, the more biologically-inspired models (e.g. dynamic mean-field) can also  
659 be enriched with further information, such as regional myelination <sup>153</sup>, or the regional  
660 distribution of specific receptors and ion channels obtained from PET or  
661 transcriptomics <sup>70–72,175,176</sup>, to reflect neurotransmitter influences. This approach may  
662 complement experimental manipulations, making it possible to systematically  
663 evaluate the causal effects of combinations of different neuromodulators on the  
664 brain's functional connectivity.

## 665 Conclusion

666 Here, we mapped the functional chemoarchitecture of the human brain, by relating  
667 the regional changes in fMRI functional connectivity induced by 7 different mind-  
668 altering drugs, and the regional distribution of 18 neurotransmitter receptors and  
669 transporters obtained from PET. This work provides a computational framework to  
670 characterise how mind-altering pharmacological agents engage the brain's rich  
671 neurotransmitter landscape to exert their effects on brain function. This analytic  
672 workflow could find fruitful application for data-driven prediction of the brain effects of  
673 candidate drugs: the mapping between neurotransmitters and pharmacological  
674 effects on brain function offers an indispensable biological lens that can reveal  
675 neurotransmitter targets for therapeutic intervention. In summary, we demonstrate  
676 that manifold patterns of neurotransmitter expression are variously engaged by an  
677 array of potent pharmacological interventions, ultimately manifesting as a large-scale  
678 hierarchical axis. Collectively, these results highlight a statistical link between  
679 molecular dynamics and drug-induced reorganisation of functional architecture.

680

## 681 Materials and Methods

682

### 683 Description of datasets

684

#### 685 Propofol

686 Propofol (2,6-diisopropylphenol) is perhaps the most common agent used for  
687 intravenous induction and maintenance of general anaesthesia <sup>32</sup>. One of the chief  
688 reasons for its widespread use, both in the operating room and for scientific studies,  
689 is propofol's rapid action, which allow for precise titration and therefore greater  
690 control over the induction and emergence process. Additionally, propofol has  
691 minimal effects on both regional cerebral blood flow <sup>178</sup>, and the coupling between  
692 blood flow and metabolism <sup>179</sup>, thereby reducing the number of potential confounding  
693 effects. Propofol is a potent agonist of inhibitory GABA-A receptors, directly  
694 activating them as well as increasing their affinity for agonists <sup>33,34</sup>, leading to  
695 suppressed neuronal activity. Propofol also blocks Na<sup>+</sup> channels, inhibiting  
696 glutamate release <sup>180</sup> and more broadly it inhibits neurotransmitter release at  
697 presynaptic terminals <sup>181</sup>. There is also some evidence that it may affect the  
698 dopaminergic system <sup>51,182,183</sup>. Here, we included two independent propofol datasets.  
699

#### 700 Western University dataset: Recruitment

701 The Western University ("Western") propofol data were collected between May and  
702 November 2014 at the Robarts Research Institute, Western University, London,  
703 Ontario (Canada), and have been published before <sup>18,144,184,185</sup>. The study received  
704 ethical approval from the Health Sciences Research Ethics Board and Psychology  
705 Research Ethics Board of Western University (Ontario, Canada). Healthy volunteers  
706 (n=19) were recruited (18–40 years; 13 males). Volunteers were right-handed, native  
707 English speakers, and had no history of neurological disorders. In accordance with  
708 relevant ethical guidelines, each volunteer provided written informed consent, and  
709 received monetary compensation for their time. Due to equipment malfunction or

710 physiological impediments to anaesthesia in the scanner, data from n=3 participants  
711 (1 male) were excluded from analyses, leaving a total n=16 for analysis <sup>18</sup>.

712 Western University dataset: Study protocol

713 Resting-state fMRI data were acquired at different propofol levels: no sedation  
714 (Awake), Deep anaesthesia (corresponding to Ramsay score of 5) and also during  
715 post-anaesthetic recovery. As previously reported <sup>18</sup>, for each condition fMRI  
716 acquisition began after two anaesthesiologists and one anaesthesia nurse  
717 independently assessed Ramsay level in the scanning room. The anaesthesiologists  
718 and the anaesthesia nurse could not be blinded to experimental condition, since part  
719 of their role involved determining the participants' level of anaesthesia. Note that the  
720 Ramsay score is designed for critical care patients, and therefore participants did not  
721 receive a score during the Awake condition before propofol administration: rather,  
722 they were required to be fully awake, alert and communicating appropriately. To  
723 provide a further, independent evaluation of participants' level of responsiveness,  
724 they were asked to perform two tasks: a test of verbal memory recall, and a  
725 computer-based auditory target-detection task. Wakefulness was also monitored  
726 using an infrared camera placed inside the scanner.

727 Propofol was administered intravenously using an AS50 auto syringe infusion pump  
728 (Baxter Healthcare, Singapore); an effect-site/plasma steering algorithm combined  
729 with the computer-controlled infusion pump was used to achieve step-wise sedation  
730 increments, followed by manual adjustments as required to reach the desired target  
731 concentrations of propofol according to the TIVA Trainer (European Society for  
732 Intravenous Anaesthesia, eurosiva.eu) pharmacokinetic simulation program. This  
733 software also specified the blood concentrations of propofol, following the Marsh 3-  
734 compartment model, which were used as targets for the pharmacokinetic model  
735 providing target-controlled infusion. After an initial propofol target effect-site  
736 concentration of  $0.6 \mu\text{g mL}^{-1}$ , concentration was gradually increased by increments  
737 of  $0.3 \mu\text{g mL}^{-1}$ , and Ramsay score was assessed after each increment: a further  
738 increment occurred if the Ramsay score was lower than 5. The mean estimated  
739 effect-site and plasma propofol concentrations were kept stable by the  
740 pharmacokinetic model delivered via the TIVA Trainer infusion pump. Ramsay level  
741 5 was achieved when participants stopped responding to verbal commands, were

742 unable to engage in conversation, and were rousable only to physical stimulation.  
743 Once both anaesthesiologists and the anaesthesia nurse all agreed that Ramsay  
744 sedation level 5 had been reached, and participants stopped responding to both  
745 tasks, data acquisition was initiated. The mean estimated effect-site propofol  
746 concentration was 2.48 (1.82- 3.14)  $\mu\text{g mL}^{-1}$ , and the mean estimated plasma  
747 propofol concentration was 2.68 (1.92- 3.44)  $\mu\text{g mL}^{-1}$ . Mean total mass of propofol  
748 administered was 486.58 (373.30- 599.86) mg. These values of variability are typical  
749 for the pharmacokinetics and pharmacodynamics of propofol. Oxygen was titrated to  
750 maintain SpO<sub>2</sub> above 96%.

751 At Ramsay 5 level, participants remained capable of spontaneous cardiovascular  
752 function and ventilation. However, the sedation procedure did not take place in a  
753 hospital setting; therefore, intubation during scanning could not be used to ensure  
754 airway security during scanning. Consequently, although two anaesthesiologists  
755 closely monitored each participant, scanner time was minimised to ensure return to  
756 normal breathing following deep sedation. No state changes or movement were  
757 noted during the deep sedation scanning for any of the participants included in the  
758 study <sup>18</sup>. Propofol was discontinued following the deep anaesthesia scan, and  
759 participants reached level 2 of the Ramsey scale approximately 11 minutes  
760 afterwards, as indicated by clear and rapid responses to verbal commands. This  
761 corresponds to the “recovery” period.

762 As previously reported <sup>18</sup>, once in the scanner participants were instructed to relax  
763 with closed eyes, without falling asleep. Resting-state functional MRI in the absence  
764 of any tasks was acquired for 8 minutes for each participant. A further scan was also  
765 acquired during auditory presentation of a plot-driven story through headphones (5-  
766 minute long). Participants were instructed to listen while keeping their eyes closed.  
767 The present analysis focuses on the resting-state data only; the story scan data have  
768 been published separately <sup>186</sup> and will not be discussed further here.

769 Western University dataset: MRI Data Acquisition

770 As previously reported <sup>18</sup>, MRI scanning was performed using a 3-Tesla Siemens  
771 Tim Trio scanner (32-channel coil), and 256 functional volumes (echo-planar images,  
772 EPI) were collected from each participant, with the following parameters: slices = 33,

773 with 25% inter-slice gap; resolution = 3mm isotropic; TR = 2000ms; TE = 30ms; flip  
774 angle = 75 degrees; matrix size = 64x64. The order of acquisition was interleaved,  
775 bottom-up. Anatomical scanning was also performed, acquiring a high-resolution T1-  
776 weighted volume (32-channel coil, 1mm isotropic voxel size) with a 3D MPRAGE  
777 sequence, using the following parameters: TA = 5min, TE = 4.25ms, 240x256 matrix  
778 size, 9 degrees flip angle <sup>18</sup>.

#### 779 Cambridge University dataset: Recruitment

780 The Cambridge University (“Cambridge”) propofol dataset is described in detail in a  
781 previous publication <sup>66</sup>. Sixteen healthy volunteer subjects were initially recruited for  
782 scanning. In addition to the original 16 volunteers, data were acquired for nine  
783 additional participants using the same procedures, bringing the total number of  
784 participants in this dataset to 25 (11 males, 14 females; mean age 34.7 years, SD =  
785 9.0 years). Ethical approval for these studies was obtained from the Cambridgeshire  
786 2 Regional Ethics Committee, and all subjects gave informed consent to participate  
787 in the study. Volunteers were informed of the risks of propofol administration, such  
788 as loss of consciousness, respiratory and cardiovascular depression. They were also  
789 informed about more minor effects of propofol such as pain on injection, sedation  
790 and amnesia. In addition, standard information about intravenous cannulation, blood  
791 sampling and MRI scanning was provided.

792

#### 793 Cambridge University dataset: Study protocol

794 Three target plasma levels of propofol were used - no drug (Awake), 0.6 mg/ml (Mild  
795 sedation) and 1.2 mg/ml (Moderate sedation). Scanning (rs-fMRI) was acquired at  
796 each stage, and also at Recovery; anatomical images were also acquired. The level  
797 of sedation was assessed verbally immediately before and after each of the  
798 scanning runs. Propofol was administered intravenously as a “target controlled  
799 infusion” (plasma concentration mode), using an Alaris PK infusion pump  
800 (Carefusion, Basingstoke, UK). A period of 10 min was allowed for equilibration of  
801 plasma and effect-site propofol concentrations. Blood samples were drawn towards  
802 the end of each titration period and before the plasma target was altered, to assess

803 plasma propofol levels. In total, 6 blood samples were drawn during the study. The  
804 mean (SD) measured plasma propofol concentration was 304.8 (141.1) ng/ml during  
805 mild sedation, 723.3 (320.5) ng/ml during moderate sedation and 275.8 (75.42)  
806 ng/ml during recovery. Mean (SD) total mass of propofol administered was 210.15  
807 (33.17) mg, equivalent to 3.0 (0.47) mg/kg. Two senior anaesthetists were present  
808 during scanning sessions and observed the subjects throughout the study from the  
809 MRI control room and on a video link that showed the subject in the scanner.  
810 Electrocardiography and pulse oximetry were performed continuously, and  
811 measurements of heart rate, non-invasive blood pressure, and oxygen saturation  
812 were recorded at regular intervals.

813

#### 814 Cambridge University dataset: MRI Data Acquisition

815 The acquisition procedures are described in detail in the original study <sup>37</sup>. Briefly,  
816 MRI data were acquired on a Siemens Trio 3T scanner (WBIC, Cambridge). For  
817 each level of sedation, 150 rs-fMRI volumes (5 min scanning) were acquired. Each  
818 functional BOLD volume consisted of 32 interleaved, descending, oblique axial  
819 slices, 3 mm thick with interslice gap of 0.75 mm and in-plane resolution of 3 mm,  
820 field of view = 192x192 mm, repetition time = 2000 ms, acquisition time = 2 s, time  
821 echo = 30 ms, and flip angle 78. T1-weighted structural images at 1 mm isotropic  
822 resolution were also acquired in the sagittal plane, using an MPRAGE sequence with  
823 TR = 2250 ms, TI = 900 ms, TE = 2.99 ms and flip angle = 9 degrees, for localization  
824 purposes. During scanning, volunteers were instructed to close their eyes and think  
825 about nothing in particular throughout the acquisition of the resting state BOLD data.  
826 Of the 25 healthy subjects, 15 were ultimately retained (7 males, 8 females): 10 were  
827 excluded, either because of missing scans (n=2), or due of excessive motion in the  
828 scanner (n=8, 5mm maximum motion threshold). For the analyses presented in this  
829 paper, we only considered the Awake, Moderate (i.e., loss of behavioural  
830 responsiveness) and Recovery resting-state scans.

831

## 832 Sevoflurane

833 Sevoflurane is an inhalational anaesthetic: specifically, a halogenated ether.  
834 Although its exact molecular mechanisms of action are yet to be fully elucidated, in  
835 vivo and in vitro evidence indicates that it acts primarily via GABA-A receptors<sup>2,35–38</sup>,  
836 but also interacts with NMDA, AMPA<sup>39,187,188</sup> and nicotinic ACh receptors<sup>189,190</sup>.  
837 Additionally, electrophysiologic investigation suggests possible affinity for as well as  
838 Na<sup>+</sup>, K<sup>+</sup> and hyperpolarization-activated cyclic nucleotide-gated (HCN) channels<sup>191</sup>.

839

## 840 Sevoflurane dataset: Recruitment

841 The data included here have been published before<sup>65,192–194</sup>, and we refer the reader  
842 to the original publication for details<sup>65</sup>. The ethics committee of the medical school of  
843 the Technische Universität München (München, Germany) approved the current  
844 study, which was conducted in accordance with the Declaration of Helsinki. Written  
845 informed consent was obtained from volunteers at least 48 h before the study  
846 session. Twenty healthy adult men (20 to 36 years of age; mean, 26 years) were  
847 recruited through campus notices and personal contact, and compensated for their  
848 participation in the study.

849 Before inclusion in the study, detailed information was provided about the protocol  
850 and risks, and medical history was reviewed to assess any previous neurologic or  
851 psychiatric disorder. A focused physical examination was performed, and a resting  
852 electrocardiogram was recorded. Further exclusion criteria were the following:  
853 physical status other than American Society of Anesthesiologists physical status I,  
854 chronic intake of medication or drugs, hardness of hearing or deafness, absence of  
855 fluency in German, known or suspected disposition to malignant hyperthermia, acute  
856 hepatic porphyria, history of halothane hepatitis, obesity with a body mass index  
857 more than 30 kg/m<sup>2</sup>, gastrointestinal disorders with a disposition for  
858 gastroesophageal regurgitation, known or suspected difficult airway, and presence of  
859 metal implants. Data acquisition took place between June and December 2013.

860

## 861 Sevoflurane dataset: Study protocol

862 Sevoflurane concentrations were chosen so that subjects tolerated artificial  
863 ventilation (reached at 2.0 vol%) and that burst-suppression (BS) was reached in all  
864 participants (around 4.4 vol%). To make group comparisons feasible, an  
865 intermediate concentration of 3.0 vol% was also used. In the MRI scanner,  
866 volunteers were in a resting state with eyes closed for 700s. Since EEG data were  
867 simultaneously acquired during MRI scanning<sup>65</sup> (though they are not analysed in the  
868 present study), visual online inspection of the EEG was used to verify that  
869 participants did not fall asleep during the pre-anaesthesia baseline scan.  
870 Sevoflurane mixed with oxygen was administered via a tight-fitting facemask using  
871 an fMRI-compatible anaesthesia machine (Fabius Tiro, Dräger, Germany). Standard  
872 American Society of Anesthesiologists monitoring was performed: concentrations of  
873 sevoflurane, oxygen and carbon dioxide, were monitored using a cardiorespiratory  
874 monitor (DatexaS/3, General electric, USA). After administering an end-tidal  
875 sevoflurane concentration (etSev) of 0.4 vol% for 5 min, sevoflurane concentration  
876 was increased in a stepwise fashion by 0.2 vol% every 3 min until the participant  
877 became unconscious, as judged by the loss of responsiveness (LOR) to the  
878 repeatedly spoken command “squeeze my hand” two consecutive times.  
879 Sevoflurane concentration was then increased to reach an end-tidal concentration of  
880 approximately 3 vol%. When clinically indicated, ventilation was managed by the  
881 physician and a laryngeal mask suitable for fMRI (I-gel, Intersurgical, United  
882 Kingdom) was inserted. The fraction of inspired oxygen was then set at 0.8, and  
883 mechanical ventilation was adjusted to maintain end-tidal carbon dioxide at steady  
884 concentrations of  $33 \pm 1.71$  mmHg during BS,  $34 \pm 1.12$  mmHg during 3 vol%, and  
885  $33 \pm 1.49$  mmHg during 2 vol% (throughout this article, mean  $\pm$  SD). Norepinephrine  
886 was given by continuous infusion ( $0.1 \pm 0.01 \mu\text{g} \cdot \text{kg}^{-1} \cdot \text{min}^{-1}$ ) through an  
887 intravenous catheter in a vein on the dorsum of the hand, to maintain the mean  
888 arterial blood pressure close to baseline values (baseline,  $96 \pm 9.36$  mmHg; BS,  $88 \pm$   
889  $7.55$  mmHg; 3 vol%,  $88 \pm 8.4$  mmHg; 2 vol%,  $89 \pm 9.37$  mmHg; follow-up,  $98 \pm 9.41$   
890 mmHg). After insertion of the laryngeal mask airway, sevoflurane concentration was  
891 gradually increased until the EEG showed burst-suppression with suppression  
892 periods of at least 1,000 ms and about 50% suppression of electrical activity  
893 (reached at  $4.34 \pm 0.22$  vol%), which is characteristic of deep anaesthesia. At that



894 point, another 700s of electroencephalogram and fMRI was recorded. Further 700s  
895 of data were acquired at steady end-tidal sevoflurane concentrations of 3 and 2  
896 vol%, respectively, each after an equilibration time of 15 min. In a final step, etSev  
897 was reduced to two times the concentration at LOR. However, most of the subjects  
898 moved or did not tolerate the laryngeal mask any more under this condition:  
899 therefore, this stage was not included in the analysis <sup>65</sup>.

900 Sevoflurane administration was then terminated, and the scanner table was slid out  
901 of the MRI scanner to monitor post-anaesthetic recovery. The volunteer was  
902 manually ventilated until spontaneous ventilation returned. The laryngeal mask was  
903 removed as soon as the patient opened his mouth on command. The physician  
904 regularly asked the volunteer to squeeze their hand: recovery of responsiveness was  
905 noted to occur as soon as the command was followed. Fifteen minutes after the time  
906 of recovery of responsiveness, the Brice interview was administered to assess for  
907 awareness during sevoflurane exposure; the interview was repeated on the phone  
908 the next day. After a total of 45 min of recovery time, another resting-state combined  
909 fMRI-EEG scan was acquired (with eyes closed, as for the baseline scan). When  
910 participants were alert, oriented, cooperative, and physiologically stable, they were  
911 taken home by a family member or a friend appointed in advance.

912

### 913 Sevoflurane dataset: MRI Data Acquisition

914 Although the original study acquired both functional MRI (fMRI) and  
915 electroencephalographic (EEG) data, in the present work we only considered the  
916 fMRI data. Data acquisition was carried out on a 3-Tesla magnetic resonance  
917 imaging scanner (Achieva Quasar Dual 3.0T 16CH, The Netherlands) with an eight-  
918 channel, phased-array head coil. The data were collected using a gradient echo  
919 planar imaging sequence (echo time = 30 ms, repetition time (TR) = 1.838 s, flip  
920 angle = 75°, field of view = 220 × 220 mm<sup>2</sup>, matrix = 72 × 72, 32 slices, slice  
921 thickness = 3 mm, and 1 mm interslice gap; 700-s acquisition time, resulting in 350  
922 functional volumes). The anatomical scan was acquired before the functional scan  
923 using a T1-weighted MPRAGE sequence with 240 × 240 × 170 voxels (1×1×1 mm  
924 voxel size) covering the whole brain. A total of 16 volunteers completed the full

925 protocol and were included in our analyses; one subject was excluded due to high  
926 motion, leaving N=15 for analysis. Here, we used fMRI data from the Awake, 3% vol,  
927 and Recovery scans.

928

## 929 Ketamine

930 Ketamine is a multi-faceted drug, in terms of both neurophysiology and how it affects  
931 subjective experience. Depending on dosage, it can act as a “dissociative”  
932 anaesthetic (high dose) or as an “atypical psychedelic” (at sub-anaesthetic dose) <sup>40–</sup>  
933 <sup>44</sup>. At small doses, it has also found recent use as a fast-acting antidepressant <sup>195,196</sup>.  
934 Both the anaesthetic and psychedelic effects of ketamine are in some respect  
935 unusual; unlike widely used anaesthetics like propofol and sevoflurane, ketamine  
936 does not exert its anaesthetic function through agonism of GABA receptors, nor does  
937 it recruit sleep-promoting hypothalamic nuclei, which it appears to suppress instead  
938 <sup>24,43</sup>. Likewise, although ketamine does induce psychedelic-like symptoms such as  
939 perceptual distortions, vivid imagery and hallucinations, like classic psychedelics, it  
940 also induces prominent dissociative symptoms of disembodiment <sup>43,63,197–199</sup>. Its  
941 psychedelic action is not mediated by the serotonin 2A receptor, on which classic  
942 psychedelics operate <sup>46,49</sup>: although its precise mechanisms of action are yet to be  
943 fully elucidated, ketamine appears to be primarily an antagonist of NMDA and HCN1  
944 receptors; however, evidence suggests that cholinergic, aminergic, and opioid  
945 systems may also play modulatory roles <sup>44,45,50</sup>.

946

## 947 Ketamine dataset: Recruitment

948 The ketamine data included in this study have been published before <sup>63</sup>, and we refer  
949 the reader to the original publication for details. Briefly, a total of 21 participants (10  
950 males; mean age 28.7 years, SD = 3.2 years) were recruited via advertisements  
951 placed throughout central Cambridge, UK <sup>63</sup>. All participants underwent a screening  
952 interview in which they were asked whether they had previously been diagnosed or  
953 treated for any mental health problems and whether they had ever taken any  
954 psychotropic medications. Participants reporting a personal history of any mental

955 health problems or a history of any treatment were excluded from the study. All  
956 participants were right-handed, were free of current of previous psychiatric or  
957 neurological disorder or substance abuse problems, and had no history of  
958 cardiovascular illness or family history of psychiatric disorder/substance abuse. The  
959 study was approved by the Cambridge Local Research and Ethics Committee, and  
960 all participants provided written informed consent in accordance with ethics  
961 committee guidelines.

962

963 Ketamine dataset: Study protocol

964 Participants were scanned (resting-state functional MRI and anatomical T1) on two  
965 occasions, separated by at least 1 week. On one occasion, they received a  
966 continuous computer-controlled intravenous infusion of a racemic ketamine solution  
967 (2 mg/ml) until a targeted plasma concentration of 100 ng/ml was reached. This  
968 concentration was sustained throughout the protocol. A saline infusion was  
969 administered on the other occasion. Infusion order was randomly counterbalanced  
970 across participants. The infusion was performed and monitored by a trained  
971 anaesthetist (R.A.) who was unblinded for safety reasons, but who otherwise had  
972 minimal contact with participants. At all other times, participants were supervised by  
973 investigators blinded to the infusion protocol. The participants remained blinded until  
974 both assessments were completed. Bilateral intravenous catheters were inserted into  
975 volunteers' forearms, one for infusion, and the other for serial blood sampling. A  
976 validated and previously implemented<sup>200</sup> three-compartment pharmacokinetic model  
977 was used to achieve a constant plasma concentration of 100 ng/ml using a  
978 computerized pump (Graseby 3500, Graseby Medical, UK). The infusion continued  
979 for 15 min to allow stabilization of plasma levels. Blood samples were drawn before  
980 and after the resting fMRI scan and then placed on ice. Plasma was obtained by  
981 centrifugation and stored at -70 °C. Plasma ketamine concentrations were measured  
982 by gas chromatography–mass spectrometry.

983

984 Ketamine dataset: MRI Data Acquisition

985 All MRI and assessment procedures were identical across assessment occasions.  
986 Scanning was performed using a 3.0 T MRI scanner (Siemens Magnetom, Trio Tim,  
987 Erlangen, Germany) equipped with a 12-channel array coil located at the Wolfson  
988 Brain Imaging Centre, Addenbrooke's Hospital, Cambridge, UK. T2\*-weighted echo-  
989 planar images were acquired under eyes-closed resting-state conditions.  
990 Participants were instructed to close their eyes and let the minds wander without  
991 going to sleep. Subsequent participant debriefing ensured that no participants fell  
992 asleep during the scan. Imaging parameters were: 3x3x3.75mm voxel size, with a  
993 time-to-repetition (TR) of 2000 ms, time-to-echo (TE) of 30 ms, flip angle of 781 in  
994 64x64 matrix size, and 240mm field of view (FOV). A total of 300 volumes  
995 comprising 32 slices each were obtained. In addition, high- resolution anatomical T1  
996 images were acquired using a three-dimensional magnetic-prepared rapid gradient  
997 echo (MPPRAGE) sequence. In all, 176 contiguous sagittal slices of 1.0mm  
998 thickness using a TR of 2300 ms, TE of 2.98 ms, flip angle of 91, and a FOV of  
999 256mm in 240x256 matrix were acquired with a voxel size of 1.0mm<sup>3</sup>. One  
1000 participant was excluded due to excessive movement, resulting in a final sample of  
1001 N=20 subjects.

1002

## 1003 LSD

1004 LSD (lysergic acid diethylamide) is perhaps the best-known among classic  
1005 psychedelics, inducing a powerful state of altered consciousness with subjective  
1006 experiences including hallucinations and “ego dissolution”<sup>46,48,49</sup>. Substantial work in  
1007 humans and animals has demonstrated that LSD influences neuromodulation,  
1008 having affinity for multiple receptors, primarily serotonergic (5-HT<sub>2A</sub>, 5-HT<sub>1A/B</sub>, 5-  
1009 HT<sub>6</sub>, 5-HT<sub>7</sub>) and dopaminergic (D<sub>1</sub> and D<sub>2</sub> receptors)<sup>46,48,52,201,202</sup>.

1010 The main neural and subjective effects of LSD originate from its agonism of the 5-  
1011 HT<sub>2A</sub> receptor: both effects are abolished by pre-treatment with the non-selective  
1012 5HT<sub>2</sub> antagonist ketanserin, which has highest affinity for the 5HT<sub>2A</sub> receptor<sup>168,203</sup>.  
1013 In humans, functional connectivity under LSD shows significant correspondence with  
1014 the spatial distribution of the 5HT<sub>2A</sub> receptor<sup>204</sup>. Providing evidence for a  
1015 mechanistic role, both PET maps and transcriptomic maps of the 5HT<sub>2A</sub> receptor

1016 (but not other serotonin receptors) have been shown to improve the ability of  
1017 computational models to recapitulate the effects of LSD on brain activity and  
1018 connectivity, as measured by fMRI <sup>71,72,175</sup>. Therefore, pharmacological and in silico  
1019 evidence converge towards the central role of the 5HT2A receptor for LSD's ability to  
1020 alter consciousness and its neural underpinnings – although other receptors have  
1021 also been shown to play an auxiliary role <sup>52</sup>.

1022

1023 LSD dataset: Recruitment

1024 The LSD data employed here have been extensively published, and we refer to the  
1025 original publication for details <sup>60</sup>. Briefly, collection of these data <sup>60</sup> was approved by  
1026 the National Research Ethics Service Committee London–West London and was  
1027 conducted in accordance with the revised declaration of Helsinki (2000), the  
1028 International Committee on Harmonization Good Clinical Practice guidelines and  
1029 National Health Service Research Governance Framework. Imperial College London  
1030 sponsored the research, which was conducted under a Home Office license for  
1031 research with schedule 1 drugs. All participants were recruited via word of mouth  
1032 and provided written informed consent to participate after study briefing and  
1033 screening for physical and mental health. The screening for physical health included  
1034 electrocardiogram (ECG), routine blood tests, and urine test for recent drug use and  
1035 pregnancy. A psychiatric interview was conducted and participants provided full  
1036 disclosure of their drug use history. Key exclusion criteria included: < 21 years of  
1037 age, personal history of diagnosed psychiatric illness, immediate family history of a  
1038 psychotic disorder, an absence of previous experience with a classic psychedelic  
1039 drug (e.g. LSD, mescaline, psilocybin/magic mushrooms or DMT/ayahuasca), any  
1040 psychedelic drug use within 6 weeks of the first scanning day, pregnancy,  
1041 problematic alcohol use (i.e. > 40 units consumed per week), or a medically  
1042 significant condition rendering the volunteer unsuitable for the study. Twenty healthy  
1043 volunteers with previous experience using psychedelic drugs were scanned.

1044

1045 LSD dataset: Study protocol

1046 Volunteers underwent two scans, 14 days apart. On one day they were given a  
1047 placebo (10-mL saline) and the other they were given an active dose of LSD (75  $\mu$ g  
1048 of LSD in 10-mL saline). The order of the conditions was balanced across  
1049 participants, and participants were blind to this order but the researchers were not.  
1050 Participants carried out VAS-style ratings via button-press and a digital display  
1051 screen presented after each scan, and the 11-factor altered states of conscious-  
1052 ness (ASC) questionnaire was completed at the end of each dosing day <sup>60</sup>. All  
1053 participants reported marked alterations of consciousness under LSD.

1054 The data acquisition protocols were described in detail in the original publication <sup>60</sup>,  
1055 so we will only describe them in brief here. The infusion (drug/placebo) was  
1056 administered over 2 min and occurred 115 min before the resting-state scans were  
1057 initiated. After infusion, subjects had a brief acclimation period in a mock MRI  
1058 scanner to prepare them for the experience of being in the real machine. ASL and  
1059 BOLD scanning consisted of three seven-minute eyes closed resting state scans.  
1060 The ASL data were not analysed for this study, and will not be discussed further.

1061

#### 1062 LSD dataset: MRI Data Acquisition

1063 The first and third scans were eyes-closed, resting state without stimulation, while  
1064 the second scan involved listening to music; however, this scan was not used in this  
1065 analysis. The precise length of each of the two BOLD scans included here was 7:20  
1066 minutes. For the present analysis, these two scans were concatenated together in  
1067 time. Imaging was performed on a 3T GE HDx system. High-resolution anatomical  
1068 images were acquired with 3D fast spoiled gradient echo scans in an axial  
1069 orientation, with field of view = 256x256x192 and matrix = 256x256x129 to yield  
1070 1mm isotropic voxel resolution. TR/TE = 7.9/3.0ms; inversion time = 450ms; flip  
1071 angle = 20. BOLD-weighted fMRI data were acquired using a gradient echo planer  
1072 imaging sequence, TR/TE = 2000/35ms, FoV = 220mm, 64x64 acquisition matrix,  
1073 parallel acceleration factor = 2, 90 flip angle. Thirty five oblique axial slices were  
1074 acquired in an interleaved fashion, each 3.4mm thick with zero slice gap (3.4mm  
1075 isotropic voxels). One subject aborted the experiment due to anxiety and four others  
1076 were excluded for excessive motion (measured in terms of frame-wise

1077 displacement), leaving 15 subjects for analysis (11 males, 4 females; mean age 30.5  
1078 years, SD = 8.0 years) <sup>60</sup>.

1079

## 1080 Ayahuasca

1081 The Amazonian beverage ayahuasca is typically used in shamanic religious rituals,  
1082 where it is obtained as a tea made from two plants: *Psychotria viridis* and  
1083 *Banisteriopsis caapi*. *Psychotria viridis* contains the tryptamine N,N-di-  
1084 methyltryptamine (DMT), which binds to sigma-1 and serotonin (particularly 2A)  
1085 receptors <sup>210,211</sup>. *Banisteriopsis caapi* contains beta-carboline alkaloids, notably  
1086 harmine, tetrahydroharmine (THH), and harmaline. As potent monoamine oxidase  
1087 inhibitors (MAOI), harmine and harmaline prevent the degradation of monoamine  
1088 neurotransmitters and thus increase their levels; and THH acts as a mild selective  
1089 serotonin reuptake inhibitor and a weak MAOI <sup>212–214</sup>.

## 1090 Ayahuasca dataset: Recruitment

1091 The ayahuasca data that we used have been published before <sup>62,137</sup>, and we refer  
1092 the reader to the original publication for details. Briefly, data were obtained from 9  
1093 healthy right-handed adult volunteers (mean age 31.3, from 24 to 47 years), all who  
1094 were experienced users of Ayahuasca with at least 5 years use (twice a month) and  
1095 at least 8 years of formal education. The experimental procedure was approved by  
1096 the Ethics and Research Committee of the University of São Paulo at Ribeirão Preto  
1097 (process number 14672/2006). Written informed consent was obtained from all  
1098 volunteers, who belonged to the Santo Daime religious organisation. All  
1099 experimental procedures were performed in accordance with the relevant guidelines  
1100 and regulations. Volunteers were not under medication for at least 3 months prior to  
1101 the scanning session and were abstinent from caffeine, nicotine and alcohol prior to  
1102 the acquisition. They had no history of neurological or psychiatric disorders, as  
1103 assessed by DSM-IV structured interview<sup>71</sup>. Subjects ingested 120–200 mL (2.2  
1104 mL/kg of body weight) of Ayahuasca known to contain 0.8 mg/mL of DMT and 0.21  
1105 mg/mL of harmine. Harmaline was not detected via the chromatography analysis, at  
1106 the threshold of 0.02 mg/mL<sup>7</sup>.

1107

1108 Ayahuasca dataset: Study protocol

1109 Volunteers underwent two distinct fMRI scanning sessions: (i) before and (ii) 40  
1110 minutes after Ayahuasca intake, when the subjective effects become noticeable (the  
1111 volunteers drank 2.2 mL/kg of body weight and the Ayahuasca contained 0.8 mg/mL  
1112 of DMT and 0.21 mg/mL of harmine, see Methods section). In both cases,  
1113 participants were instructed to close their eyes and remain awake and at rest,  
1114 without performing any task.

1115

1116 Ayahuasca dataset: MRI Data Acquisition

1117 The fMRI images were obtained in a 1.5 T scanner (Siemens, Magnetom Vision),  
1118 using an EPI-BOLD like sequence comprising 150 volumes, with the following  
1119 parameters: TR = 1700 ms; TE = 66 ms; FOV = 220 mm; matrix 64 × 64; voxel  
1120 dimensions of 1.72 mm × 1.72 mm × 1.72 mm. Whole brain high resolution T1-  
1121 weighted images were also acquired (156 contiguous sagittal slices) using a  
1122 multiplanar reconstructed gradient-echo sequence, with the following parameters:  
1123 TR = 9.7 ms; TE = 44 ms; flip angle 12°; matrix 256 × 256; FOV = 256 mm, voxel  
1124 size = 1 mm × 1 mm × 1 mm. Data from one volunteer were excluded from analyses  
1125 due to acquisition limitations resulting in incomplete brain coverage. The final dataset  
1126 included 8 subjects.

1127

1128 Modafinil

1129 Modafinil is a wakefulness promoting drug used for the treatment of sleep disorders  
1130 such as narcolepsy (under the commercial name Provigil), as well as finding use as  
1131 a cognitive enhancer for attention and memory <sup>6,7,64</sup>, and to combat the cognitive  
1132 symptoms of Attention Deficit/Hyperactivity Disorder (ADHD), and mood disorders,  
1133 owing to its lower addiction risk in comparison with amphetamine-like  
1134 psychostimulants <sup>6-9,215</sup>. This drug has a broad neurotransmitter profile: it acts as a  
1135 blocker of the dopamine and noradrenaline transporters, as well as modulating locus



1136 coeruleus noradrenergic firing, and acting on the wake-promoting hypothalamic  
1137 neuropeptide orexin to activate the histamine system; it also influences both the  
1138 glutamate and GABA systems <sup>8,216–220</sup>.

1139

1140 Modafinil dataset: Recruitment

1141 The modafinil dataset has been published before <sup>64,221</sup>. As reported in the original  
1142 publication, the study was approved by the ethics committee of University of Chieti  
1143 (PROT 2008/09 COET on 14/10/2009) and conducted in accordance with the  
1144 Helsinki Declaration. The study design was explained in detail and written informed  
1145 consent was obtained from all participants involved in our study. Recruitment was  
1146 performed throughout February 2011, drug/placebo administration and fMRI  
1147 acquisitions started on March 2011, went on until January 2012, and the study was  
1148 completed with the last fMRI session in January 2012. After securing financial  
1149 coverage for costs related to the analysis of the study, the trial was registered on  
1150 10/09/2012 (ClinicalTrials.gov  
1151 NCT01684306<http://clinicaltrials.gov/ct2/show/NCT01684306>). After obtaining  
1152 registration, the double-blind study was opened and analyzed.

1153 This dataset was obtained from the OpenfMRI database. Its accession number is  
1154 ds000133. A total of twenty six young male right-handed (as assessed by the  
1155 EdinburghHandedness inventory) adults (age range: 25–35 years) with comparable  
1156 levels of education (13 years) were enrolled. All subjects had no past or current  
1157 signs of psychiatric, neurological or medical (hypertension, cardiac disorders,  
1158 epilepsy) conditions as determined by the Millon test and by clinical examination.  
1159 Subjects showing visual or motor impairments were excluded as well as individuals  
1160 taking psychoactive drugs or having a history of alcohol abuse. All volunteers were  
1161 instructed to maintain their usual amount of nicotine and caffeine intake and avoid  
1162 alcohol consumption in the 12h before the initiation of the study.

1163

1164 Modafinil dataset: Study protocol

1165 Study subjects received, in a double blind fashion, either a single dose of modafinil  
1166 (100 mg) (modafinil group; N=13) or a placebo (placebo group; N=13) pill identical to  
1167 the drug. Randomization of study subjects was obtained by means of a random  
1168 number generator. Here, we only considered data from the modafinil group. The day  
1169 after drug/placebo assumption, subjects were asked about perceived side effects  
1170 and, in particular, sleep disturbances. All but one reported no modafinil-induced side-  
1171 effects or alterations in the sleep-wake cycle. Rs-fMRI BOLD data were separated in  
1172 three runs lasting four minutes each followed by high resolution T1 anatomical  
1173 images. Two scanning sessions took place: one before ingesting the drug/placebo,  
1174 and one 3 hours later, to account for pharmacokinetics. Subjects were asked to relax  
1175 while fixating the central point in the middle of a grey-background screen that was  
1176 projected on an LCD screen and viewed through a mirror placed above the subject's  
1177 head. Subject head was positioned within an eight-channel coil and foam padding  
1178 was employed to minimize involuntary head movements.

1179

1180 Modafinil dataset: MRI Data Acquisition

1181 BOLD functional imaging was performed with a Philips Achieva 3T Scanner (Philips  
1182 Medical Systems, Best, The Netherlands), using T2\*-weighted echo planar imaging  
1183 (EPI) free induction decay (FID) sequences and applying the following parameters:  
1184 TE 35 ms, matrix size 64x64, FOV 256 mm, in-plane voxel size 464 mm, flip angle  
1185 75 degrees, slice thickness 4 mm and no gaps. 140 functional volumes consisting of  
1186 30 transaxial slices were acquired per run with a volume TR of 1,671 ms. High-  
1187 resolution structural images were acquired at the end of the three rs-fMRI runs  
1188 through a 3D MPRAGE sequence employing the following parameters: sagittal,  
1189 matrix 256x256, FOV 256 mm, slice thickness 1 mm, no gaps, in-plane voxel size 1  
1190 mm x 1 mm, flip angle 12 degrees, TR = 9.7 ms and TE = 4 ms. Two subjects from  
1191 the modafinil group were excluded from analysis due to acquisition limitations,  
1192 leaving N=11 subjects for analysis.

1193

## 1194 Methylphenidate

1195 Methylphenidate is used as a cognitive enhancer to treat the cognitive symptoms of  
1196 ADHD and narcolepsy (under the name Ritalin)<sup>4,11</sup>. Pharmacologically, it inhibits the  
1197 reuptake of both dopamine and noradrenaline by blocking their transporters;  
1198 although yet to be conclusively confirmed, there is also in vitro evidence suggesting  
1199 an additional minor affinity of methylphenidate for the 5-HT<sub>1A</sub> receptor<sup>222–228</sup>.

1200

## 1201 Methylphenidate dataset: Recruitment

1202 The methylphenidate dataset used here has been published before<sup>10,51</sup>. Unlike the  
1203 other datasets included in this study, the methylphenidate data were not obtained  
1204 from healthy controls, but rather from a cohort of patients suffering from traumatic  
1205 brain injury (TBI). Volunteers with a history of moderate to severe traumatic brain  
1206 injury (inclusion criteria: age 18–60 years and not recruited to more than three  
1207 research studies within the calendar year) were referred from the Addenbrooke's  
1208 Neurosciences Critical Care Unit Follow-Up Clinic, Addenbrooke's Traumatic Brain  
1209 Injury Clinic and The Royal London Hospital Intensive Care Unit (see the original  
1210 publication for details of patient injuries). The patients were sent a written invitation  
1211 to take part in the study. All volunteers gave written informed consent before  
1212 participating in the study.

1213 Thirty-eight volunteers were recruited to the study; 17 (12 male, 5 female) into the  
1214 TBI arm of the study and 21 (13 male, 8 female) into the healthy control (HC) arm of  
1215 the study. Exclusion criteria included National Adult Reading Test (NART) <70, Mini  
1216 Mental State Examination (MMSE) <23, left-handedness, history of drug/alcohol  
1217 abuse, history of psychiatric or neurological disorders, contraindications for MRI  
1218 scanning, medication that may affect cognitive performance or prescribed for  
1219 depression, and any physical handicap that could prevent the completion of testing.

1220 Our sample contains mostly patients with diffuse axonal injuries and small lesions.  
1221 The patients were at least 6 months post TBI. Four sustained moderate TBI with a  
1222 score of between 9 and 12 on the Glasgow Coma Scale (GCS) and 11 sustained

1223 severe TBI with a GCS score of 8 or below on presentation. The mean age of the  
1224 patient group was 36 years ( $\pm 13$  years).

1225

1226 Methylphenidate dataset: Study protocol

1227 The study consisted of two visits (separated by 2–4 weeks) for both groups of  
1228 participants. The TBI volunteers were randomly allocated in a Latin square design to  
1229 receive one of the two interventions on the first visit (a placebo tablet or 30 mg tablet  
1230 of methylphenidate), and the alternate intervention on the second visit. The decision  
1231 to use 30 mg of methylphenidate was based on comparable doses used in previous  
1232 studies in healthy participants (Gilbert et al., 2006; Marquand et al., 2011; Costa et  
1233 al., 2013) as well as NICE guidelines for medication in adults  
1234 ([www.nice.org.uk](http://www.nice.org.uk)) which stipulate that when methylphenidate is titrated for side  
1235 effects and responsiveness in each individual subject, the dose should range from a  
1236 minimum of 15 mg to a maximum dose of 100 mg. As the dose of methylphenidate  
1237 was not calculated by the participant's body weight, an interventional dose at the  
1238 lower end of the dose range was chosen, which had also been used in previous  
1239 studies (Gilbert et al., 2006; Marquand et al., 2011; Costa et al., 2013; Fallon et al.,  
1240 2017). After a delay of 75 min to ensure that peak plasma levels of methylphenidate  
1241 were reached, the volunteers completed a MRI scan which included both fMRI and  
1242 structural image acquisition. The volunteers attended their two fMRI assessments at  
1243 the same time interval as the patients, but without any pharmacological intervention.  
1244 Therefore, here we only considered the patient data.

1245

1246 Methylphenidate dataset: MRI Data Acquisition

1247 MRI data were acquired on a Siemens Trio 3-Tesla MR system (Siemens AG,  
1248 Munich, Germany). MRI scanning started with the acquisition of a localizer scan and  
1249 was followed by a 3D high resolution MPRAGE image [Relaxation Time (TR) 2,300  
1250 ms, Echo Time (TE) 2.98 ms, Flip Angle 9°, FOV 256×256 mm<sup>2</sup>]. Diffusion Tensor  
1251 Imaging (DTI) data (63 non-collinear directions,  $b=1,000$  s/mm<sup>2</sup> with one volume  
1252 acquired without diffusion weighting ( $b=0$ ), echo time 106ms, repetition time 1,700

1253 ms, field of view 192×192 mm, 2 mm isotropic voxels) were also collected to  
1254 investigate white matter integrity. Here, we did not analyse the DTI data.

1255 Functional imaging data were acquired using an echo-planar imaging (EPI)  
1256 sequence with parameters TR = 2,000 ms, TE = 30 ms, Flip Angle = 78°, FOV  
1257 192×192 mm<sup>2</sup>, in-plane resolution 3.0×3.0 mm, 32 slices 3.0 mm thick with a gap of  
1258 0.75 mm between slices. Two patients were excluded from the analysis (one patient  
1259 only attended one of the study sessions and the other had excessive movement  
1260 artifacts in their fMRI scan), leaving N=15 patients for analysis.

1261

## 1262 Functional MRI preprocessing and denoising

### 1263 Preprocessing

1264 The preprocessing and image analysis were performed using the CONN toolbox,  
1265 version 17f (CONN; <http://www.nitrc.org/projects/conn>)<sup>229</sup> based on Statistical  
1266 Parametric Mapping 12 (<http://www.fil.ion.ucl.ac.uk/spm>), implemented in MATLAB  
1267 2016a. For each dataset and condition, we applied a standard preprocessing  
1268 pipeline, the same as we employed in our previous studies<sup>18,21,138,194</sup>. The pipeline  
1269 involved the following steps: removal of the first five volumes, to achieve steady-  
1270 state magnetization; motion correction; slice-timing correction; identification of outlier  
1271 volumes for subsequent scrubbing by means of the quality assurance/artifact  
1272 rejection software *art* ([http://www.nitrc.org/projects/artifact\\_detect](http://www.nitrc.org/projects/artifact_detect)); normalisation to  
1273 Montreal Neurological Institute (MNI-152) standard space (2 mm isotropic  
1274 resampling resolution), using the segmented grey matter image from each  
1275 volunteer's T1-weighted anatomical image, together with an *a priori* grey matter  
1276 template.

1277

### 1278 Denoising

1279 Denoising was also performed using the CONN toolbox. To reduce noise due to  
1280 cardiac and motion artifacts, which are known to impact functional connectivity<sup>230</sup>,  
1281 we applied the anatomical CompCor (aCompCor) method of denoising the functional

1282 data <sup>231</sup> as implemented within the CONN toolbox. The aCompCor method involves  
1283 regressing out of the functional data the first five principal components attributable to  
1284 white matter and cerebrospinal fluid (CSF) signal; six subject-specific realignment  
1285 parameters (three translations and three rotations) as well as their first-order  
1286 temporal derivatives; followed by scrubbing our outliers identified by ART, using  
1287 Ordinary Least Squares regression <sup>229</sup>. Finally, the denoised BOLD signal timeseries  
1288 were linearly detrended and band-pass filtered to eliminate both low-frequency drift  
1289 effects and high-frequency noise, thus retaining frequencies between 0.008 and 0.09  
1290 Hz.

1291 The step of global signal regression (GSR) has received substantial attention in the  
1292 literature as a denoising method <sup>232–234</sup>. GSR mathematically mandates that  
1293 approximately 50% of correlations between regions will be negative <sup>235</sup>; however, the  
1294 proportion of anticorrelations between brain regions has been shown to vary across  
1295 states of consciousness, including anaesthesia and psychedelics <sup>18,138</sup>. Indeed,  
1296 recent work has demonstrated that the global signal contains information about  
1297 states of consciousness <sup>236</sup>. Therefore, in line with our previous studies, here we  
1298 decided to avoid GSR in favour of the aCompCor denoising procedure, which is  
1299 among those recommended for investigations of dynamic connectivity <sup>233</sup>.

1300

## 1301 Summarising pharmacological effects on brain function

1302 For each subject at each condition, the denoised regional BOLD signals were  
1303 parcellated into 100 cortical regions according to the local-global functional  
1304 parcellation of Schaefer and colleagues <sup>107</sup>. The parcellated regional BOLD signals  
1305 were then correlated (“functional connectivity”); after removing negative-valued  
1306 edges, the regional strength of functional connectivity (node strength) was measured  
1307 for each region. The regional change in FC strength was then quantified for each  
1308 subject (for the methylphenidate dataset, this was quantified with respect to the  
1309 mean of controls’ node strength values). Finally, for each dataset, we computed the  
1310 mean across subjects of the FC strength deltas. Therefore, each pharmacological  
1311 intervention was summarised as one vector of regional FC strength deltas (Figure 1).

1312

## 1313 Receptor maps from Positron Emission Tomography

1314 Receptor densities were estimated using PET tracer studies for a total of 18  
1315 receptors and transporters, across 9 neurotransmitter systems, recently made  
1316 available by Hansen and colleagues  
1317 at [https://github.com/netneurolab/hansen\\_receptors](https://github.com/netneurolab/hansen_receptors)<sup>31</sup>. These include dopamine (D1  
1318 <sup>74</sup>, D2 <sup>75–78</sup>, DAT <sup>79</sup>), norepinephrine (NET <sup>80–83</sup>), serotonin (5-HT1A <sup>84</sup>, 5-HT1B <sup>84–  
1319 87,87–89</sup>, 5-HT2A <sup>90</sup>, 5-HT4 <sup>90</sup>, 5-HT6 <sup>91,92</sup>, 5-HTT <sup>90</sup>), acetylcholine ( $\alpha$ 4 $\beta$ 2 <sup>93,94</sup>, M1 <sup>95</sup>,  
1320 VACHT <sup>96,97</sup>), glutamate (mGluR5 <sup>98,99</sup>), GABA (GABA-A <sup>100</sup>), histamine (H3 <sup>101</sup>),  
1321 cannabinoid (CB1 <sup>102–105</sup>), and opioid (MOR <sup>106</sup>). Volumetric PET images were  
1322 registered to the MNI-ICBM 152 nonlinear 2009 (version c, asymmetric) template,  
1323 averaged across participants within each study, then parcellated and  
1324 receptors/transporters with more than one mean image of the same tracer (5-HT1b,  
1325 D2, VACHT) were combined using a weighted average. See Hansen et al <sup>31</sup> for  
1326 detailed information about each map and their limitations.

1327

## 1328 Partial Least Squares Analysis

1329

1330 PLS analysis was used to relate regional neurotransmitter density to  
1331 pharmacologically-induced functional connectivity changes. PLS analysis is an  
1332 unsupervised multivariate statistical technique that decomposes relationships  
1333 between two datasets (in our case, neurotransmitter density with  $n$  regions and  $r$   
1334 neurotransmitters,  $X_{n \times r}$ , and drug-induced functional connectivity changes,  $Y_{n \times d}$  with  $n$   
1335 regions and  $d$  drugs) into orthogonal sets of latent variables with maximum  
1336 covariance, which are linear combinations of the original data <sup>115,116</sup>. In other words,  
1337 PLS finds components from the predictor variables (100  $\times$  18 matrix of regional  
1338 neurotransmitter receptor and transporter density scores) that have maximum  
1339 covariance with the response variables (100  $\times$  12 matrix of regional changes in FC  
1340 induced by different drugs). The PLS components (i.e., linear combinations of the  
1341 weighted neurotransmitter density) are ranked by covariance between predictor and  
1342 response variables, so that the first few PLS components provide a low-dimensional  
1343 representation of the covariance between the higher dimensional data matrices.  
1344 Thus, the first PLS component (PLS1) is the linear combination of the weighted

1345 neurotransmitter density scores that have a brain expression map that covaries the  
1346 most with the map of regional FC changes.

1347

1348 This is achieved by z-scoring both data matrices column-wise and applying singular  
1349 value decomposition on the matrix  $Y'X$ , such that:

1350

$$1351 \qquad (Y'X)' = USV' \qquad (1)$$

1352

1353  
1354 where  $U_{gxt}$  and  $V_{txt}$  are orthonormal matrices consisting of left and right singular  
1355 vectors and  $S_{txt}$  is a diagonal matrix of singular values. The  $i^{\text{th}}$  columns of  $U$  and  $V$   
1356 constitute a latent variable, and the  $i^{\text{th}}$  singular value in  $S$  represents the covariance  
1357 between singular vectors. The  $i^{\text{th}}$  singular value is proportional to the amount of  
1358 covariance between neurotransmitter density, and drug-induced FC changes  
1359 captured by the  $i^{\text{th}}$  latent variable, where the effect size can be estimated as the ratio  
1360 of the squared singular value to the sum of all squared singular values. In the  
1361 present study, the left singular vectors (that is, the columns of  $U$ ) represent the  
1362 degree to which each neurotransmitter contributes to the latent variable and  
1363 demonstrate the extracted association between neurotransmitter density and drug-  
1364 induced FC changes (neurotransmitter weights). The right singular vectors (that is,  
1365 the columns of  $V$ ) represent the degree to which the FC changes contribute to the  
1366 same latent variable (term weights). Positively weighed neurotransmitters covary  
1367 with positively weighed drug-induced changes, and negatively weighed  
1368 neurotransmitters covary with negatively weighed drug-induced changes.

1369

1370 Scores at each brain region for each latent variable can be computed by projecting  
1371 the original data onto the singular vector weights. Positively scored brain regions are  
1372 regions that demonstrate the covariance between the prevalence of positively  
1373 weighted neurotransmitters and positively weighted drug-induced effects (and vice  
1374 versa for negatively scored brain regions). Loadings for each variable were  
1375 computed as the Pearson's correlation between each individual variable's activity  
1376 (neurotransmitter density and drug-induced FC changes) and the PLS analysis-  
1377 derived neurotransmitter score pattern. Squaring the loading (a correlation) equals  
1378 the percentage variance shared between an original variable and the PLS analysis-



1379 derived latent variable. Variables with high absolute loadings are highly correlated to  
1380 the score pattern, indicating a large amount of shared variance between the  
1381 individual variable and the latent variable.

1382

1383 We confirmed that PLS1 explained the largest amount of variance by testing across  
1384 a range of PLS components (between 1 and 12) and quantifying the relative variance  
1385 explained by each component. The statistical significance of the variance explained  
1386 by each PLS model was tested by permuting the response variables 1,000 times,  
1387 while considering the spatial dependency of the data by using spatial  
1388 autocorrelation-preserving permutation tests, termed spin tests<sup>117–120</sup>. Parcel  
1389 coordinates were projected onto the spherical surface and then randomly rotated  
1390 and original parcels were reassigned the value of the closest rotated parcel (10,000  
1391 repetitions). The procedure was performed at the parcel resolution rather than the  
1392 vertex resolution to avoid upsampling the data. In PLS analysis, the spin test is  
1393 applied to the singular values (or equivalently, the covariance explained) of the latent  
1394 variables, producing a null distribution of singular values. This is done applying PLS  
1395 analysis to the original  $X$  matrix and a spun  $Y$  matrix. The spin test embodies the null  
1396 hypothesis that neurotransmitter density and drug-induced FC changes are spatially  
1397 correlated with each other only because of inherent spatial autocorrelation. The  $p$ -  
1398 value is computed as the proportion of null singular values that are greater in  
1399 magnitude than the empirical singular values. Thus, these  $p$ -values represent the  
1400 probability that the observed spatial correspondence between neurotransmitter  
1401 density and drug-induced FC changes could occur by randomly correlating maps  
1402 with comparable spatial autocorrelation.

1403

## 1404 Hierarchical organisation

1405

1406 We quantified the spatial similarity of each pharmacologically-induced pattern of  
1407 change in FC strength, with several canonical maps of hierarchical brain  
1408 organisation (“canonical brain hierarchies”) derived from multimodal neuroimaging.  
1409 We considered the anatomical gradient of intracortical myelination obtained from  
1410 T1w/T2w MRI ratio<sup>58</sup>; evolutionary cortical expansion obtained by comparing human  
1411 and macaque<sup>122</sup>; the principal component of variation in gene expression from the

1412 Allen Human Brain Atlas transcriptomic database (AHBA; <https://human.brain->  
1413 [map.org/](https://human.brain-map.org/)), referred to as “AHBA PC1”<sup>54,59,123</sup>; the principal component of variation in  
1414 task activation from NeuroSynth, (<https://github.com/neurosynth/neurosynth>), an  
1415 online meta-analytic tool that synthesizes results from more than 15,000 published  
1416 fMRI studies by searching for high-frequency key words that are published alongside  
1417 fMRI voxel coordinates, using the volumetric association test maps (referred to as  
1418 “NeuroSynth PC1”) <sup>54,59,124</sup>; the map of cerebral blood flow <sup>54</sup>; the principal gradient  
1419 of variation in functional connectivity <sup>57</sup>; and a recently derived gradient of regional  
1420 prevalence of different kinds of information, from redundancy to synergy <sup>125</sup>.

1421

1422 Spatial similarity between brain maps was quantified in terms of Spearman  
1423 correlation, and statistical significance was assessed against a spin-based null  
1424 model with preserved spatial autocorrelation, as described above <sup>117–120</sup>.

1425

1426

## 1427 ENIGMA cortical vulnerability data

1428

1429 Patterns of cortical thickness were collected for the available 11 neurological,  
1430 neurodevelopmental, and psychiatric disorders from the ENIGMA (Enhancing  
1431 Neuroimaging Genetics through Meta-Analysis) consortium and the *enigma* toolbox  
1432 (<https://github.com/MICA-MNI/ENIGMA>) <sup>126</sup>: 22q11.2 deletion syndrome (22q) <sup>127</sup>,  
1433 attention-deficit/hyperactivity disorder (ADHD) <sup>128</sup>, autism spectrum disorder (ASD)  
1434 <sup>129</sup>, idiopathic generalized epilepsy <sup>130</sup>, right temporal lobe epilepsy <sup>130</sup>, left temporal  
1435 lobe epilepsy <sup>130</sup>, depression <sup>131</sup>, obsessive-compulsive disorder (OCD) <sup>132</sup>,  
1436 schizophrenia <sup>133</sup>, bipolar disorder (BD) <sup>134</sup>, and Parkinson’s disease (PD) <sup>135</sup>. The  
1437 ENIGMA consortium is a data-sharing initiative that relies on standardized image  
1438 acquisition and processing pipelines, such that disorder maps are comparable <sup>237</sup>.  
1439 Altogether, over 21,000 patients were scanned across the thirteen disorders, against  
1440 almost 26,000 controls. The values for each map are z-scored effect sizes (Cohen’s  
1441 *d*) of cortical thickness in patient populations versus healthy controls. Imaging and  
1442 processing protocols can be found at <http://enigma.ini.usc.edu/protocols/>.

1443 For every brain region, we constructed an 11-element vector of disorder abnormality,  
1444 where each element represents a disorder’s cortical abnormality at the region. For  
1445 every pair of brain regions, we correlated the abnormality vectors to quantify how  
1446 similarly two brain regions are affected across disorders. This results in a region-by-  
1447 region matrix of “disorder co-susceptibility” <sup>109</sup>.

1448  
1449

## 1450 Acknowledgements

1451

1452 This work was carried out thanks to support from the Gates Cambridge Trust (OPP 1144) [to  
1453 ALL]; the Wellcome Trust Research Training Fellowship (grant no. 083660/Z/07/Z), Raymond  
1454 and Beverly Sackler Studentship, and the Cambridge Commonwealth Trust [to RA]; the  
1455 Canadian Institute for Advanced Research (CIFAR; grant RCZB/072 RG93193) [to DKM and  
1456 EAS]; the Cambridge Biomedical Research Centre and NIHR Senior Investigator Awards  
1457 and the British Oxygen Professorship of the Royal College of Anaesthetists [to DKM]; the  
1458 Stephen Erskine Fellowship at Queens' College, Cambridge [to EAS]. BM is supported by  
1459 the Natural Sciences and Engineering Research Council of Canada (NSERC Discovery  
1460 Grant RGPIN #017-04265) and Canada Research Chairs Program. JYH is supported by the  
1461 Helmholtz International BigBrain Analytics & Learning Laboratory, the Natural Sciences and  
1462 Engineering Research Council of Canada, and Fonds de recherches de Québec. AMO is  
1463 supported by the Canada Excellence Research Chairs program (215063); LN acknowledges  
1464 support by the L'Oreal-Unesco for Women in Science Excellence Research Fellowship. LR  
1465 acknowledges support of the Imperial College President's Scholarship. SLS is supported by  
1466 funds from the Italian Department of Education [Fondo per gli Investimenti della Ricerca di  
1467 Base (FIRB) 2003; Programmi di Ricerca di Rilevante Interesse nazionale (PRIN) 2008].  
1468 RLC-H was supported by the Alex Mosley Charitable Trust and supporters of the Centre for  
1469 Psychedelic Research during the period of data collection and now holds the Ralph Metzner  
1470 Distinguished Professorship at UCSF. The original LSD study received support from a  
1471 Crowd Funding Campaign and the Beckley Foundation, as part of the Beckley-Imperial  
1472 Research Programme. The ketamine study was funded by the Bernard Wolfe Health  
1473 Neuroscience Fund and the Wellcome Trust. Data acquisition for the sevoflurane dataset  
1474 was funded by the Departments of Anesthesiology, Neurology, and Neuroradiology of the  
1475 Klinikum rechts der Isar of the Technical University Munich. Computing infrastructure at the  
1476 Wolfson Brain Imaging Centre (WBIC-HPHI) was funded by the MRC research infrastructure  
1477 award (MR/M009041/1). We acknowledge the contribution of Santo Daime members for  
1478 volunteering and for providing the Ayahuasca. We also thank members of the Cognition and  
1479 Consciousness Imaging Group, and of the Network Neuroscience Lab, for many helpful  
1480 discussions.

1481

## 1482 Conflicts of Interest

1483 RCH reports receiving scientific advisory fees in the last 2 years from: Enttheon Biomedical and  
1484 Beckley Psytech. All other authors report no conflicts of interest.  
1485

## 1486 Data availability

1487 Pharmacological-fMRI data are available upon request from the corresponding authors of  
1488 the original publications referenced herein. The neurotransmitter receptor and transporter  
1489 PET maps are available at [https://github.com/netneurolab/hansen\\_receptors](https://github.com/netneurolab/hansen_receptors). The Allen  
1490 Human Brain Atlas transcriptomic database is available at <https://human.brain-map.org/>;  
1491 NeuroSynth is available at <https://github.com/neurosynth/neurosynth>. The ENIGMA toolbox  
1492 is available at  
1493 <https://github.com/MICA-MNI/ENIGMA>.

## 1494 References

- 1495
- 1496 1. Wandschneider, B. & Koepp, M. J. PharmacofMRI: Determining the functional  
1497 anatomy of the effects of medication. *NeuroImage Clin.* **12**, 691–697 (2016).
  - 1498 2. Brown, E. N., Lydic, R. & Schiff, N. D. General Anesthesia, Sleep, and Coma. *N. Engl.*  
1499 *J. Med.* **27**, 2638–50 (2010).
  - 1500 3. Cortese, S. *et al.* Comparative efficacy and tolerability of medications for attention-  
1501 deficit hyperactivity disorder in children, adolescents, and adults: a systematic review  
1502 and network meta-analysis. *Lancet Psychiatry* **5**, 727–738 (2018).
  - 1503 4. Faraone, S. V. The pharmacology of amphetamine and methylphenidate: Relevance to  
1504 the neurobiology of attention-deficit/hyperactivity disorder and other psychiatric  
1505 comorbidities. *Neurosci. Biobehav. Rev.* **87**, 255–270 (2018).
  - 1506 5. Moldofsky, H., Broughton, R. J. & Hill, J. D. A randomized trial of the long-term,  
1507 continued efficacy and safety of modafinil in narcolepsy. *Sleep Med.* **1**, 109–116  
1508 (2000).
  - 1509 6. Turner, D. C. *et al.* Cognitive enhancing effects of modafinil in healthy volunteers.  
1510 *Psychopharmacology (Berl.)* **165**, 260–269 (2003).

- 1511 7. Minzenberg, M. J. & Carter, C. S. Modafinil: a review of neurochemical actions and  
1512 effects on cognition. *Neuropsychopharmacol. Off. Publ. Am. Coll.*  
1513 *Neuropsychopharmacol.* **33**, 1477–1502 (2008).
- 1514 8. Minzenberg, M. J., Watrous, A. J., Yoon, J. H., Ursu, S. & Carter, C. S. Modafinil shifts  
1515 human locus coeruleus to low-tonic, high-phasic activity during functional MRI. *Science*  
1516 **322**, 1700–1702 (2008).
- 1517 9. Kahbazi, M. *et al.* A randomized, double-blind and placebo-controlled trial of modafinil  
1518 in children and adolescents with attention deficit and hyperactivity disorder. *Psychiatry*  
1519 *Res.* **168**, 234–237 (2009).
- 1520 10. Manktelow, A. E., Menon, D. K., Sahakian, B. J. & Stamatakis, E. A. Working Memory  
1521 after Traumatic Brain Injury: The Neural Basis of Improved Performance with  
1522 Methylphenidate. *Front. Behav. Neurosci.* **11**, (2017).
- 1523 11. Storebø, O. J. *et al.* Methylphenidate for attention deficit hyperactivity disorder (ADHD)  
1524 in children and adolescents – assessment of adverse events in non-randomised  
1525 studies. *Cochrane Database Syst. Rev.* **2018**, CD012069 (2018).
- 1526 12. Carhart-Harris, R. *et al.* Trial of Psilocybin versus Escitalopram for Depression. *N. Engl.*  
1527 *J. Med.* **384**, 1402–1411 (2021).
- 1528 13. de Gregorio, D. *et al.* Hallucinogens in mental health: Preclinical and clinical studies on  
1529 LSD, psilocybin, MDMA, and ketamine. *J. Neurosci.* **41**, 891–900 (2021).
- 1530 14. Mitchell, J. M. *et al.* MDMA-assisted therapy for severe PTSD: a randomized, double-  
1531 blind, placebo-controlled phase 3 study. *Nat. Med.* **2021 276 27**, 1025–1033 (2021).
- 1532 15. Davis, A. K. *et al.* Effects of Psilocybin-Assisted Therapy on Major Depressive Disorder:  
1533 A Randomized Clinical Trial. *JAMA Psychiatry* (2020)  
1534 doi:10.1001/jamapsychiatry.2020.3285.
- 1535 16. Vollenweider, F. X. & Preller, K. H. Psychedelic drugs: neurobiology and potential for  
1536 treatment of psychiatric disorders. *Nat. Rev. Neurosci.* **21**, 611–624 (2020).
- 1537 17. Vargas, M. V., Meyer, R., Avanes, A. A., Rus, M. & Olson, D. E. Psychedelics and  
1538 Other Psychoplastogens for Treating Mental Illness. *Front. Psychiatry* **12**, 1691 (2021).

- 1539 18. Luppi, A. I. *et al.* Consciousness-specific dynamic interactions of brain integration and  
1540 functional diversity. *Nat. Commun.* **10**, (2019).
- 1541 19. Huang, Z., Zhang, J., Wu, J., Mashour, G. A. & Hudetz, A. G. Temporal circuit of  
1542 macroscale dynamic brain activity supports human consciousness. *Sci. Adv.* **6**, 87–98  
1543 (2020).
- 1544 20. Campbell, J. M. *et al.* Pharmacologically informed machine learning approach for  
1545 identifying pathological states of unconsciousness via resting-state fMRI. *NeuroImage*  
1546 **206**, 116316 (2020).
- 1547 21. Luppi, A. I. *et al.* Connectome Harmonic Decomposition of Human Brain Dynamics  
1548 Reveals a Landscape of Consciousness. *bioRxiv* (2020)  
1549 doi:10.1101/2020.08.10.244459.
- 1550 22. Sarasso, S. *et al.* Consciousness and complexity during unresponsiveness induced by  
1551 propofol, xenon, and ketamine. *Curr. Biol.* **25**, 3099–3105 (2015).
- 1552 23. Schartner, M. M., Carhart-Harris, R. L., Barrett, A. B., Seth, A. K. &  
1553 Muthukumaraswamy, S. D. Increased spontaneous MEG signal diversity for  
1554 psychoactive doses of ketamine, LSD and psilocybin. *Sci. Rep.* **7**, 46421 (2017).
- 1555 24. Li, D. & Mashour, G. A. Cortical dynamics during psychedelic and anesthetized states  
1556 induced by ketamine. *NeuroImage* **196**, 32–40 (2019).
- 1557 25. Johnson, M. W., Hendricks, P. S., Barrett, F. S. & Griffiths, R. R. Classic psychedelics:  
1558 An integrative review of epidemiology, therapeutics, mystical experience, and brain  
1559 network function. *Pharmacol. Ther.* **197**, 83–102 (2019).
- 1560 26. Carhart-Harris, R. L. & Goodwin, G. M. The Therapeutic Potential of Psychedelic  
1561 Drugs: Past, Present, and Future. *Neuropsychopharmacol. Off. Publ. Am. Coll.*  
1562 *Neuropsychopharmacol.* **42**, 2105–2113 (2017).
- 1563 27. Goulas, A. *et al.* The natural axis of transmitter receptor distribution in the human  
1564 cerebral cortex. *Proc. Natl. Acad. Sci. U. S. A.* **118**, (2021).
- 1565 28. Zilles, K. & Palomero-Gallagher, N. Multiple transmitter receptors in regions and layers  
1566 of the human cerebral cortex. *Front. Neuroanat.* **11**, 78 (2017).

- 1567 29. Suárez, L. E., Markello, R. D., Betzel, R. F. & Misic, B. Linking Structure and Function  
1568 in Macroscale Brain Networks. *Trends Cogn. Sci.* **24**, 302–315 (2020).
- 1569 30. Shine, J. M. Neuromodulatory Influences on Integration and Segregation in the Brain.  
1570 *Trends Cogn. Sci.* **23**, 572–583 (2019).
- 1571 31. Hansen, J. Y. *et al.* Mapping neurotransmitter systems to the structural and functional  
1572 organization of the human neocortex. *Nat. Neurosci.* **(accepted)**, 1–26 (2022).
- 1573 32. Trapani, G., Altomare, C., Sanna, E., Biggio, G. & Liso, G. Propofol in Anesthesia.  
1574 Mechanism of Action, Structure-Activity Relationships, and Drug Delivery. *Curr. Med.*  
1575 *Chem.* **7**, 249–271 (2000).
- 1576 33. Jurd, R. *et al.* General anesthetic actions *in vivo* strongly attenuated by a point mutation  
1577 in the GABA<sub>A</sub> receptor  $\beta$ 3 subunit. *FASEB J.* **17**, 250–252 (2003).
- 1578 34. Yip, G. M. S. *et al.* A propofol binding site on mammalian GABA<sub>A</sub> receptors identified  
1579 by photolabeling. *Nat. Chem. Biol.* **9**, 715–720 (2013).
- 1580 35. Nishikawa, K. & Harrison, N. L. The Actions of Sevoflurane and Desflurane on the  $\gamma$ -  
1581 Aminobutyric Acid Receptor Type A: Effects of TM2 Mutations in the  $\alpha$  and  $\beta$  Subunits.  
1582 *Anesthesiology* **99**, 678–684 (2003).
- 1583 36. Wu, J., Harata, N. & Akaike, N. Potentiation by sevoflurane of the gamma-aminobutyric  
1584 acid-induced chloride current in acutely dissociated CA1 pyramidal neurones from rat  
1585 hippocampus. *Br. J. Pharmacol.* **119**, 1013–1021 (1996).
- 1586 37. Hirota, K. & Roth, S. H. Sevoflurane modulates both GABAA and GABAB receptors in  
1587 area CA1 of rat hippocampus. *Br. J. Anaesth.* **78**, 60–65 (1997).
- 1588 38. Jenkins, A., Franks, N. P. & Lieb, W. R. Effects of temperature and volatile anesthetics  
1589 on GABA(A) receptors. *Anesthesiology* **90**, 484–491 (1999).
- 1590 39. Campagna, J. A., Miller, K. W. & Forman, S. A. Mechanisms of actions of inhaled  
1591 anesthetics. *N. Engl. J. Med.* **348**, 2110–2124 (2003).
- 1592 40. Domino, E. F. Taming the ketamine tiger. *Anesthesiology* **113**, 678–684 (2010).
- 1593 41. Domino, E. F., Chodoff, P. & Corssen, G. Pharmacologic effects of CI-581, a new  
1594 dissociative anesthetic, in man. *Clin. Pharmacol. Ther.* **6**, 279–291 (1965).

- 1595 42. Krystal, J. H. *et al.* Subanesthetic Effects of the Noncompetitive NMDA Antagonist,  
1596 Ketamine, in Humans: Psychotomimetic, Perceptual, Cognitive, and Neuroendocrine  
1597 Responses. *Arch. Gen. Psychiatry* **51**, 199–214 (1994).
- 1598 43. Mashour, G. A. Top-down mechanisms of anesthetic-induced unconsciousness. *Front.*  
1599 *Syst. Neurosci.* **8**, (2014).
- 1600 44. Olney, J. W., Newcomer, J. W. & Farber, N. B. NMDA receptor hypofunction model of  
1601 schizophrenia. *J. Psychiatr. Res.* **33**, 523–533 (1999).
- 1602 45. Li, L. & Vlisides, P. E. Ketamine: 50 Years of Modulating the Mind. *Front. Hum.*  
1603 *Neurosci.* **10**, (2016).
- 1604 46. Nichols, D. E. Psychedelics. *Pharmacol. Rev.* **68**, 264–355 (2016).
- 1605 47. Glennon, R. A., Titeler, M. & McKenney, J. D. Evidence for 5-HT<sub>2</sub> involvement in the  
1606 mechanism of action of hallucinogenic agents. *Life Sci.* **35**, 2505–2511 (1984).
- 1607 48. Nichols, D. E. Dark Classics in Chemical Neuroscience: Lysergic Acid Diethylamide  
1608 (LSD). *ACS Chem. Neurosci.* **9**, 2331–2343 (2018).
- 1609 49. Nichols, D. E. Hallucinogens. *Pharmacol. Ther.* **101**, 131–181 (2004).
- 1610 50. Sleight, J., Harvey, M., Voss, L. & Denny, B. Ketamine – More mechanisms of action  
1611 than just NMDA blockade. *Trends Anaesth. Crit. Care* **4**, 76–81 (2014).
- 1612 51. Spindler, L. R. B. *et al.* Dopaminergic brainstem disconnection is common to  
1613 pharmacological and pathological consciousness perturbation. *Proc. Natl. Acad. Sci. U.*  
1614 *S. A.* **118**, e2026289118 (2021).
- 1615 52. Lawn, T. *et al.* Differential contributions of serotonergic and dopaminergic functional  
1616 connectivity to the phenomenology of LSD. *Psychopharmacology (Berl.)* (2022)  
1617 doi:10.1007/S00213-022-06117-5.
- 1618 53. Ballentine, G., Friedman, S. F. & Bzdok, D. Trips and neurotransmitters: Discovering  
1619 principled patterns across 6850 hallucinogenic experiences. *Sci. Adv.* **8**, eabl6989  
1620 (2022).



- 1621 54. Sydnor, V. J. *et al.* Neurodevelopment of the association cortices: Patterns,  
1622 mechanisms, and implications for psychopathology. *Neuron* (2021)  
1623 doi:10.1016/j.neuron.2021.06.016.
- 1624 55. Huntenburg, J. M. *et al.* A Systematic Relationship Between Functional Connectivity  
1625 and Intracortical Myelin in the Human Cerebral Cortex. *Cereb. Cortex* **27**, 981–997  
1626 (2017).
- 1627 56. Valk, S. L. *et al.* Genetic and phylogenetic uncoupling of structure and function in  
1628 human transmodal cortex. *bioRxiv* **5**, 2021.06.08.447522 (2021).
- 1629 57. Margulies, D. S. *et al.* Situating the default-mode network along a principal gradient of  
1630 macroscale cortical organization. *Proc. Natl. Acad. Sci. U. S. A.* **113**, 12574–12579  
1631 (2016).
- 1632 58. Burt, J. B. *et al.* Hierarchy of transcriptomic specialization across human cortex  
1633 captured by structural neuroimaging topography. *Nat. Neurosci.* **21**, 1251–1259 (2018).
- 1634 59. Hansen, J. Y. *et al.* Mapping gene transcription and neurocognition across human  
1635 neocortex. *Nat. Hum. Behav.* 1–11 (2021) doi:10.1038/s41562-021-01082-z.
- 1636 60. Carhart-Harris, R. L. *et al.* Neural correlates of the LSD experience revealed by  
1637 multimodal neuroimaging. *Proc. Natl. Acad. Sci.* **113**, 201518377 (2016).
- 1638 61. Carhart-Harris, R. L. *et al.* Neural correlates of the psychedelic state as determined by  
1639 fMRI studies with psilocybin. *Proc. Natl. Acad. Sci.* **109**, 2138–2143 (2012).
- 1640 62. Viol, A., Palhano-Fontes, F., Onias, H., De Araujo, D. B. & Viswanathan, G. M.  
1641 Shannon entropy of brain functional complex networks under the influence of the  
1642 psychedelic Ayahuasca. *Sci. Rep.* **7**, (2017).
- 1643 63. Dandash, O. *et al.* Selective Augmentation of Striatal Functional Connectivity Following  
1644 NMDA Receptor Antagonism: Implications for Psychosis. *Neuropsychopharmacology*  
1645 **40**, 622–631 (2015).
- 1646 64. Esposito, R. *et al.* Acute Effects of Modafinil on Brain Resting State Networks in Young  
1647 Healthy Subjects. *PLoS ONE* **8**, (2013).

- 1648 65. Ranft, A. *et al.* Neural Correlates of Sevoflurane-induced Unconsciousness Identified  
1649 by Simultaneous Functional Magnetic Resonance Imaging and  
1650 Electroencephalography. *Anesthesiology* **125**, 861–872 (2016).
- 1651 66. Stamatakis, E. A., Adapa, R. M., Absalom, A. R. & Menon, D. K. Changes in resting  
1652 neural connectivity during propofol sedation. *PloS One* **5**, e14224 (2010).
- 1653 67. Naci, L., Sinai, L. & Owen, A. M. Detecting and interpreting conscious experiences in  
1654 behaviorally non-responsive patients. *NeuroImage* **145**, 304–313 (2017).
- 1655 68. Dipasquale, O. *et al.* Unravelling the effects of methylphenidate on the dopaminergic  
1656 and noradrenergic functional circuits. doi:10.1038/s41386-020-0724-x.
- 1657 69. Dipasquale, O. *et al.* Receptor-Enriched Analysis of functional connectivity by targets  
1658 (REACT): A novel, multimodal analytical approach informed by PET to study the  
1659 pharmacodynamic response of the brain under MDMA. (2019)  
1660 doi:10.1016/j.neuroimage.2019.04.007.
- 1661 70. Kringelbach, M. L. *et al.* Dynamic coupling of whole-brain neuronal and  
1662 neurotransmitter systems. *Proc. Natl. Acad. Sci. U. S. A.* **117**, 9566–9576 (2020).
- 1663 71. Deco, G. *et al.* Whole-Brain Multimodal Neuroimaging Model Using Serotonin Receptor  
1664 Maps Explains Non-linear Functional Effects of LSD. *Curr. Biol.* **28**, 3065–3074 (2018).
- 1665 72. Burt, J. *et al.* Transcriptomics-informed large-scale cortical model captures topography  
1666 of pharmacological neuroimaging effects of LSD. *eLife* **10**, (2021).
- 1667 73. Parker Singleton, S. A. *et al.* Psychedelics Flatten the brain's energy landscape:  
1668 evidence from receptor-informed network control theory. *bioRxiv* 2021.05.14.444193  
1669 (2021) doi:10.1101/2021.05.14.444193.
- 1670 74. Kaller, S. *et al.* Test–retest measurements of dopamine D1-type receptors using  
1671 simultaneous PET/MRI imaging. *Eur. J. Nucl. Med. Mol. Imaging* **44**, (2017).
- 1672 75. Sandiego, C. M. *et al.* Reference region modeling approaches for amphetamine  
1673 challenge studies with [<sup>11</sup>C]FLB 457 and PET. *J. Cereb. Blood Flow Metab. Off. J. Int.*  
1674 *Soc. Cereb. Blood Flow Metab.* **35**, 623–629 (2015).

- 1675 76. Slifstein, M. *et al.* Deficits in prefrontal cortical and extrastriatal dopamine release in  
1676 schizophrenia: a positron emission tomographic functional magnetic resonance imaging  
1677 study. *JAMA Psychiatry* **72**, 316–324 (2015).
- 1678 77. Smith, C. T. *et al.* Partial-volume correction increases estimated dopamine D2-like  
1679 receptor binding potential and reduces adult age differences. *J. Cereb. Blood Flow*  
1680 *Metab. Off. J. Int. Soc. Cereb. Blood Flow Metab.* **39**, 822–833 (2019).
- 1681 78. Zakiniaez, Y. *et al.* Sex differences in amphetamine-induced dopamine release in the  
1682 dorsolateral prefrontal cortex of tobacco smokers. *Neuropsychopharmacol. Off. Publ.*  
1683 *Am. Coll. Neuropsychopharmacol.* **44**, 2205–2211 (2019).
- 1684 79. Dukart, J. *et al.* Cerebral blood flow predicts differential neurotransmitter activity. *Sci.*  
1685 *Rep.* **8**, 4074 (2018).
- 1686 80. Sanchez-Rangel, E. *et al.* Norepinephrine transporter availability in brown fat is  
1687 reduced in obesity: a human PET study with [11C] MRB. *Int. J. Obes.* **44**, 964–967  
1688 (2020).
- 1689 81. Ding, Y.-S. *et al.* PET imaging of the effects of age and cocaine on the norepinephrine  
1690 transporter in the human brain using (S,S)-[(11)C]O-methylreboxetine and HRRT.  
1691 *Synap. N. Y. N* **64**, 30–38 (2010).
- 1692 82. Belfort-DeAguiar, R. *et al.* Noradrenergic Activity in the Human Brain: A Mechanism  
1693 Supporting the Defense Against Hypoglycemia. *J. Clin. Endocrinol. Metab.* **103**, 2244–  
1694 2252 (2018).
- 1695 83. Li, C. R. *et al.* Decreased norepinephrine transporter availability in obesity: Positron  
1696 Emission Tomography imaging with (S,S)-[(11)C]O-methylreboxetine. *NeuroImage* **86**,  
1697 306–310 (2014).
- 1698 84. Savli, M. *et al.* Normative database of the serotonergic system in healthy subjects using  
1699 multi-tracer PET. *NeuroImage* **63**, 447–459 (2012).
- 1700 85. Gallezot, J.-D. *et al.* Kinetic modeling of the serotonin 5-HT(1B) receptor radioligand  
1701 [(11)C]P943 in humans. *J. Cereb. Blood Flow Metab. Off. J. Int. Soc. Cereb. Blood*  
1702 *Flow Metab.* **30**, 196–210 (2010).

- 1703 86. Matuskey, D. *et al.* Reductions in brain 5-HT<sub>1B</sub> receptor availability in primarily  
1704 cocaine-dependent humans. *Biol. Psychiatry* **76**, 816–822 (2014).
- 1705 87. Murrough, J. W. *et al.* The effect of early trauma exposure on serotonin type 1B  
1706 receptor expression revealed by reduced selective radioligand binding. *Arch. Gen.*  
1707 *Psychiatry* **68**, 892–900 (2011).
- 1708 88. Pittenger, C. *et al.* OCD is associated with an altered association between sensorimotor  
1709 gating and cortical and subcortical 5-HT<sub>1b</sub> receptor binding. *J. Affect. Disord.* **196**, 87–  
1710 96 (2016).
- 1711 89. Saricicek, A. *et al.* Test-retest reliability of the novel 5-HT<sub>1B</sub> receptor PET radioligand  
1712 [<sup>11</sup>C]P943. *Eur. J. Nucl. Med. Mol. Imaging* **42**, 468–477 (2015).
- 1713 90. Beliveau, V. *et al.* A High-Resolution In Vivo Atlas of the Human Brain’s Serotonin  
1714 System. *J. Neurosci.* **37**, 120 (2017).
- 1715 91. Radhakrishnan, R. *et al.* In vivo 5-HT<sub>6</sub> and 5-HT<sub>2A</sub> receptor availability in antipsychotic  
1716 treated schizophrenia patients vs. unmedicated healthy humans measured with  
1717 [<sup>11</sup>C]GSK215083 PET. *Psychiatry Res. Neuroimaging* **295**, 111007 (2020).
- 1718 92. Radhakrishnan, R. *et al.* Age-Related Change in 5-HT<sub>6</sub> Receptor Availability in Healthy  
1719 Male Volunteers Measured with <sup>11</sup>C-GSK215083 PET. *J. Nucl. Med.* **59**, 1445–1450  
1720 (2018).
- 1721 93. Hillmer, A. T. *et al.* Imaging of cerebral  $\alpha 4\beta 2^*$  nicotinic acetylcholine receptors with (-)-  
1722 [(<sup>18</sup>F)]Flubatine PET: Implementation of bolus plus constant infusion and sensitivity to  
1723 acetylcholine in human brain. *NeuroImage* **141**, 71–80 (2016).
- 1724 94. Baldassarri, S. R. *et al.* Use of Electronic Cigarettes Leads to Significant Beta<sub>2</sub>-  
1725 Nicotinic Acetylcholine Receptor Occupancy: Evidence From a PET Imaging Study.  
1726 *Nicotine Tob. Res. Off. J. Soc. Res. Nicotine Tob.* **20**, 425–433 (2018).
- 1727 95. Naganawa, M. *et al.* First-in-Human Assessment of <sup>11</sup>C-LSN3172176, an M<sub>1</sub>  
1728 Muscarinic Acetylcholine Receptor PET Radiotracer. *J. Nucl. Med. Off. Publ. Soc. Nucl.*  
1729 *Med.* **62**, 553–560 (2021).

- 1730 96. Bedard, M.-A. *et al.* Brain cholinergic alterations in idiopathic REM sleep behaviour  
1731 disorder: a PET imaging study with 18F-FEOBV. *Sleep Med.* **58**, 35–41 (2019).
- 1732 97. Aghourian, M. *et al.* Quantification of brain cholinergic denervation in Alzheimer's  
1733 disease using PET imaging with [18F]-FEOBV. *Mol. Psychiatry* **22**, 1531–1538 (2017).
- 1734 98. Smart, K. *et al.* Sex differences in [11C]ABP688 binding: a positron emission  
1735 tomography study of mGlu5 receptors. *Eur. J. Nucl. Med. Mol. Imaging* **46**, 1179–1183  
1736 (2019).
- 1737 99. DuBois, J. M. *et al.* Characterization of age/sex and the regional distribution of mGluR5  
1738 availability in the healthy human brain measured by high-resolution [(11)C]ABP688  
1739 PET. *Eur. J. Nucl. Med. Mol. Imaging* **43**, 152–162 (2016).
- 1740 100. Nørgaard, M. *et al.* A High-Resolution In Vivo Atlas of the Human Brain's  
1741 Benzodiazepine Binding Site of GABA A Receptors. *NeuroImage* **232**, 117878 (2021).
- 1742 101. Gallezot, J.-D. *et al.* Determination of receptor occupancy in the presence of mass  
1743 dose: [11C]GSK189254 PET imaging of histamine H3 receptor occupancy by PF-  
1744 03654746. *J. Cereb. Blood Flow Metab. Off. J. Int. Soc. Cereb. Blood Flow Metab.* **37**,  
1745 1095–1107 (2017).
- 1746 102. D'Souza, D. C. *et al.* Rapid Changes in CB1 Receptor Availability in Cannabis  
1747 Dependent Males after Abstinence from Cannabis. *Biol. Psychiatry Cogn. Neurosci.*  
1748 *Neuroimaging* **1**, 60–67 (2016).
- 1749 103. Neumeister, A. *et al.* Positron emission tomography shows elevated cannabinoid CB1  
1750 receptor binding in men with alcohol dependence. *Alcohol. Clin. Exp. Res.* **36**, 2104–  
1751 2109 (2012).
- 1752 104. Normandin, M. D. *et al.* Imaging the cannabinoid CB1 receptor in humans with  
1753 [11C]OMAR: assessment of kinetic analysis methods, test-retest reproducibility, and  
1754 gender differences. *J. Cereb. Blood Flow Metab. Off. J. Int. Soc. Cereb. Blood Flow*  
1755 *Metab.* **35**, 1313–1322 (2015).
- 1756 105. Ranganathan, M. *et al.* Reduced Brain Cannabinoid Receptor Availability in  
1757 Schizophrenia. *Biol. Psychiatry* **79**, 997–1005 (2016).

- 1758 106. Kantonen, T. *et al.* Interindividual variability and lateralization of  $\mu$ -opioid receptors in  
1759 the human brain. *NeuroImage* **217**, 116922 (2020).
- 1760 107. Schaefer, A. *et al.* Local-Global Parcellation of the Human Cerebral Cortex from  
1761 Intrinsic Functional Connectivity MRI. *Cereb. Cortex* **28**, 3095–3114 (2018).
- 1762 108. Cammoun, L. *et al.* Mapping the human connectome at multiple scales with diffusion  
1763 spectrum MRI. *J. Neurosci. Methods* **203**, 386–397 (2012).
- 1764 109. Hansen, J. Y. *et al.* Molecular and connectomic vulnerability shape cross-disorder  
1765 cortical abnormalities. *bioRxiv* 2022.01.21.476409 (2022)  
1766 doi:10.1101/2022.01.21.476409.
- 1767 110. Betzel, R. F. & Bassett, D. S. Specificity and robustness of long-distance connections in  
1768 weighted, interareal connectomes. *Proc Natl Acad Sci USA* (2018)  
1769 doi:10.1073/pnas.1720186115.
- 1770 111. Roberts, J. A. *et al.* The contribution of geometry to the human connectome.  
1771 *NeuroImage* **124**, 379–393 (2016).
- 1772 112. Stiso, J. & Bassett, D. S. Spatial Embedding Imposes Constraints on Neuronal Network  
1773 Architectures. *Trends Cogn. Sci.* **22**, 1127–1142 (2018).
- 1774 113. Wold, S., Josefson, M., Gottfries, J. & Linusson, A. The utility of multivariate design in  
1775 PLS modeling. *J. Chemom.* **18**, 156–165 (2004).
- 1776 114. McIntosh, A. R. & Lobaugh, N. J. Partial least squares analysis of neuroimaging data:  
1777 applications and advances. *NeuroImage* **23 Suppl 1**, S250-263 (2004).
- 1778 115. Krishnan, A., Williams, L. J., McIntosh, A. R. & Abdi, H. Partial Least Squares (PLS)  
1779 methods for neuroimaging: A tutorial and review. *NeuroImage* **56**, 455–475 (2011).
- 1780 116. McIntosh, A. R. & Mišić, B. Multivariate Statistical Analyses for Neuroimaging Data.  
1781 *Annu. Rev. Psychol.* **64**, 499–525 (2013).
- 1782 117. Markello, R. D. & Misic, B. Comparing spatial null models for brain maps. *NeuroImage*  
1783 **236**, 118052 (2021).
- 1784 118. Váša, F. & Mišić, B. M. *Null Models in Network Neuroscience*.

- 1785 119. Váša, F. *et al.* Adolescent tuning of association cortex in human structural brain  
1786 networks. *Cereb. Cortex* **28**, 281–294 (2018).
- 1787 120. Alexander-Bloch, A. F. *et al.* On testing for spatial correspondence between maps of  
1788 human brain structure and function. *NeuroImage* **178**, 540–551 (2018).
- 1789 121. Yeo, B. T. T. *et al.* The organization of the human cerebral cortex estimated by intrinsic  
1790 functional connectivity. *J. Neurophysiol.* **106**, 1125–1165 (2011).
- 1791 122. Hill, J. *et al.* Similar patterns of cortical expansion during human development and  
1792 evolution. *Proc. Natl. Acad. Sci.* **107**, 13135–13140 (2010).
- 1793 123. Hawrylycz, M. J. *et al.* An anatomically comprehensive atlas of the adult human brain  
1794 transcriptome. *Nature* **489**, 391–399 (2012).
- 1795 124. Yarkoni, T., Poldrack, R. A., Nichols, T. E., Van Essen, D. C. & Wager, T. D. Large-  
1796 scale automated synthesis of human functional neuroimaging data. *Nat. Methods* **8**,  
1797 665–670 (2011).
- 1798 125. Luppi, A. I. *et al.* A synergistic core for human brain evolution and cognition. *Nat.*  
1799 *Neurosci.* **25**, 771–782 (2022).
- 1800 126. Larivière, S. *et al.* The ENIGMA Toolbox: multiscale neural contextualization of multisite  
1801 neuroimaging datasets. *Nat. Methods* **2021 187 18**, 698–700 (2021).
- 1802 127. Sun, D. *et al.* Large-scale mapping of cortical alterations in 22q11.2 deletion syndrome:  
1803 Convergence with idiopathic psychosis and effects of deletion size. *Mol. Psychiatry* **25**,  
1804 1822–1834 (2020).
- 1805 128. Hoogman, M. *et al.* Brain Imaging of the Cortex in ADHD: A Coordinated Analysis of  
1806 Large-Scale Clinical and Population-Based Samples. *Am. J. Psychiatry* **176**, 531–542  
1807 (2019).
- 1808 129. van Rooij, D. *et al.* Cortical and Subcortical Brain Morphometry Differences Between  
1809 Patients With Autism Spectrum Disorder and Healthy Individuals Across the Lifespan:  
1810 Results From the ENIGMA ASD Working Group. *Am. J. Psychiatry* **175**, 359–369  
1811 (2018).

- 1812 130. Whelan, C. D. *et al.* Structural brain abnormalities in the common epilepsies assessed  
1813 in a worldwide ENIGMA study. *Brain J. Neurol.* **141**, 391–408 (2018).
- 1814 131. Schmaal, L. *et al.* Cortical abnormalities in adults and adolescents with major  
1815 depression based on brain scans from 20 cohorts worldwide in the ENIGMA Major  
1816 Depressive Disorder Working Group. *Mol. Psychiatry* **22**, 900–909 (2017).
- 1817 132. Boedhoe, P. S. W. *et al.* Cortical Abnormalities Associated With Pediatric and Adult  
1818 Obsessive-Compulsive Disorder: Findings From the ENIGMA Obsessive-Compulsive  
1819 Disorder Working Group. *Am. J. Psychiatry* **175**, 453–462 (2018).
- 1820 133. van Erp, T. G. M. *et al.* Cortical Brain Abnormalities in 4474 Individuals With  
1821 Schizophrenia and 5098 Control Subjects via the Enhancing Neuro Imaging Genetics  
1822 Through Meta Analysis (ENIGMA) Consortium. *Biol. Psychiatry* **84**, 644–654 (2018).
- 1823 134. Hibar, D. P. *et al.* Cortical abnormalities in bipolar disorder: an MRI analysis of 6503  
1824 individuals from the ENIGMA Bipolar Disorder Working Group. *Mol. Psychiatry* **23**,  
1825 932–942 (2018).
- 1826 135. Laansma, M. A. *et al.* International Multicenter Analysis of Brain Structure Across  
1827 Clinical Stages of Parkinson’s Disease. *Mov. Disord.* **36**, 2583–2594 (2021).
- 1828 136. Paquola, C. *et al.* A multi-scale cortical wiring space links cellular architecture and  
1829 functional dynamics in the human brain. *PLOS Biol.* **18**, e3000979 (2020).
- 1830 137. Viol, A. *et al.* Characterizing complex networks using entropy-degree diagrams:  
1831 Unveiling changes in functional brain connectivity induced by Ayahuasca. *Entropy* **21**,  
1832 (2019).
- 1833 138. Luppi, A. I. *et al.* LSD alters dynamic integration and segregation in the human brain.  
1834 *NeuroImage* **227**, 117653 (2021).
- 1835 139. Atasoy, S. *et al.* Connectome-harmonic decomposition of human brain activity reveals  
1836 dynamical repertoire re-organization under LSD. *Sci. Rep.* **7**, 1–18 (2017).
- 1837 140. Lord, L. D. *et al.* Dynamical exploration of the repertoire of brain networks at rest is  
1838 modulated by psilocybin. *NeuroImage* **199**, 127–142 (2019).



- 1839 141. Schartner, M. *et al.* Complexity of multi-dimensional spontaneous EEG decreases  
1840 during propofol induced general anaesthesia. *PLoS ONE* **10**, (2015).
- 1841 142. Toker, D. *et al.* Consciousness is supported by near-critical cortical electrodynamics.  
1842 doi:10.1073/pnas.XXXXXXXXXX.
- 1843 143. Carhart-Harris, R. L. & Friston, K. J. REBUS and the anarchic brain: Toward a unified  
1844 model of the brain action of psychedelics. *Pharmacol. Rev.* **71**, 316–344 (2019).
- 1845 144. Varley, T. F. *et al.* Consciousness & Brain Functional Complexity in Propofol  
1846 Anaesthesia. *Sci. Rep.* **10**, 1–13 (2020).
- 1847 145. Varley, T. F. *et al.* Fractal dimension of cortical functional connectivity networks &  
1848 severity of disorders of consciousness. *PLoS ONE* **15**, 1–20 (2020).
- 1849 146. Varley, T. F., Carhart-Harris, R., Roseman, L., Menon, D. K. & Stamatakis, E. A.  
1850 Serotonergic psychedelics LSD & psilocybin increase the fractal dimension of cortical  
1851 brain activity in spatial and temporal domains. *NeuroImage* **220**, (2020).
- 1852 147. Lebedev, A. V. *et al.* LSD-induced entropic brain activity predicts subsequent  
1853 personality change. *Hum. Brain Mapp.* **37**, 3203–3213 (2016).
- 1854 148. Bonhomme, V. *et al.* Resting-state Network-specific Breakdown of Functional  
1855 Connectivity during Ketamine Alteration of Consciousness in Volunteers.  
1856 *Anesthesiology* **125**, 873–888 (2016).
- 1857 149. Boveroux, P., Vanhaudenhuyse, A. & Phillips, C. Breakdown of within- and between-  
1858 network Resting State during Propofol-induced Loss of Consciousness. *Anesthesiology*  
1859 **113**, 1038–1053 (2010).
- 1860 150. Wu, H. *et al.* Anterior precuneus related to the recovery of consciousness. *NeuroImage*  
1861 *Clin.* **33**, 102951 (2022).
- 1862 151. Palhano-Fontes, F. *et al.* The psychedelic state induced by Ayahuasca modulates the  
1863 activity and connectivity of the Default Mode Network. *PLoS ONE* **10**, (2015).
- 1864 152. Girn, M. *et al.* LSD flattens the functional hierarchy of the human brain. *bioRxiv*  
1865 2020.05.01.072314 (2020) doi:10.1101/2020.05.01.072314.

- 1866 153. Demirtaş, M. *et al.* Hierarchical Heterogeneity across Human Cortex Shapes Large-  
1867 Scale Neural Dynamics. *Neuron* **101**, 1181-1194.e13 (2019).
- 1868 154. Beul, S. F. & Hilgetag, C. C. Neuron density fundamentally relates to architecture and  
1869 connectivity of the primate cerebral cortex. *NeuroImage* **189**, 777–792 (2019).
- 1870 155. Baum, G. L. *et al.* Development of structure–function coupling in human brain networks  
1871 during youth. *Proc. Natl. Acad. Sci. U. S. A.* **117**, 771–778 (2020).
- 1872 156. Alamia, A., Timmermann, C., Vanrullen, R. & Carhart-Harris, R. L. DMT alters cortical  
1873 travelling waves. *eLife* **9**, 1–16 (2020).
- 1874 157. Lawrence, D. W., Carhart-Harris, R., Griffiths, R. & Timmermann, C. Phenomenology  
1875 and content of the inhaled N, N-dimethyltryptamine (N, N-DMT) experience. *Sci. Rep.*  
1876 **12**, 8562 (2022).
- 1877 158. Doss, M. K. *et al.* The Acute Effects of the Atypical Dissociative Hallucinogen Salvinorin  
1878 A on Functional Connectivity in the Human Brain. *Sci. Rep.* **10**, 16392 (123AD).
- 1879 159. Akeju, O. *et al.* Disruption of thalamic functional connectivity is a neural correlate of  
1880 dexmedetomidine-induced unconsciousness. *eLife* **3**, (2014).
- 1881 160. Guldenmund, P. *et al.* Brain functional connectivity differentiates dexmedetomidine  
1882 from propofol and natural sleep. *BJA Br. J. Anaesth.* **119**, 674–684 (2017).
- 1883 161. Nelson, L. E. *et al.* The  $\alpha$ 2-adrenoceptor agonist dexmedetomidine converges on an  
1884 endogenous sleep-promoting pathway to exert its sedative effects. *Anesthesiology* **98**,  
1885 428–436 (2003).
- 1886 162. Lee, U. *et al.* Disruption of frontal-parietal communication by ketamine, propofol, and  
1887 sevoflurane. *Anesthesiology* **118**, 1264–75 (2013).
- 1888 163. Van de Bittner, G. C., Ricq, E. L. & Hooker, J. M. A philosophy for CNS radiotracer  
1889 design. *Acc. Chem. Res.* **47**, 3127–3134 (2014).
- 1890 164. Elsinga, P. H., Hatano, K. & Ishiwata, K. PET tracers for imaging of the dopaminergic  
1891 system. *Curr. Med. Chem.* **13**, 2139–2153 (2006).
- 1892 165. Redinbaugh, M. J. *et al.* Thalamus modulates consciousness via layer-specific control  
1893 of cortex. *Neuron* **106**, 66-75.e12 (2020).

- 1894 166. Tasserie, J. *et al.* Deep brain stimulation of the thalamus restores signatures of  
1895 consciousness in a nonhuman primate model. *Sci Adv* **8**, 5547 (2022).
- 1896 167. Barttfeld, P. *et al.* Factoring the brain signatures of anesthesia concentration and level  
1897 of arousal across individuals. *NeuroImage Clin.* **9**, 385–391 (2015).
- 1898 168. Preller, K. H. *et al.* Changes in global and thalamic brain connectivity in LSD-induced  
1899 altered states of consciousness are attributable to the 5-HT<sub>2A</sub> receptor. *eLife* **7**, (2018).
- 1900 169. Preller, K. H. *et al.* Effective connectivity changes in LSD-induced altered states of  
1901 consciousness in humans. *Proc. Natl. Acad. Sci. U. S. A.* **116**, 2743–2748 (2019).
- 1902 170. Shine, J. M. The thalamus integrates the macrosystems of the brain to facilitate  
1903 complex, adaptive brain network dynamics. *Prog. Neurobiol.* 101951 (2020)  
1904 doi:10.1016/j.pneurobio.2020.101951.
- 1905 171. Kringelbach, M. L. & Deco, G. Brain States and Transitions: Insights from  
1906 Computational Neuroscience. *Cell Rep.* **32**, 108128 (2020).
- 1907 172. Cofré, R. *et al.* Whole-brain models to explore altered states of consciousness from the  
1908 bottom up. *Brain Sci.* **10**, 1–29 (2020).
- 1909 173. Deco, G. & Kringelbach, M. L. Great expectations: Using whole-brain computational  
1910 connectomics for understanding neuropsychiatric disorders. *Neuron* **84**, 892–905  
1911 (2014).
- 1912 174. Shine, J. M. *et al.* Computational models link cellular mechanisms of neuromodulation  
1913 to large-scale neural dynamics. *Nat. Neurosci.* 1–12 (2021) doi:10.1038/s41593-021-  
1914 00824-6.
- 1915 175. Herzog, R. *et al.* A mechanistic model of the neural entropy increase elicited by  
1916 psychedelic drugs. *Sci. Rep.* **10**, 17725 (2020).
- 1917 176. Luppi, A. I. *et al.* Whole-brain modelling identifies distinct but convergent paths to  
1918 unconsciousness in anaesthesia and disorders of consciousness. *Commun. Biol.* **5**,  
1919 384 (2022).

- 1920 177. Tian, Y., Margulies, D., Breakspear, M. & Zalesky, A. Topographic organization of the  
1921 human subcortex unveiled with functional connectivity gradients. *Nat. Neurosci.* **23**,  
1922 1421–1432 (2020).
- 1923 178. Veselis, R. A., Feshchenko, V. A., Reinsel, R. A., Beattie, B. & Akhurst, T. J. Propofol  
1924 and thiopental do not interfere with regional cerebral blood flow response at sedative  
1925 concentrations. *Anesthesiology* **102**, 26–34 (2005).
- 1926 179. Johnston, A. J. *et al.* Effects of propofol on cerebral oxygenation and metabolism after  
1927 head injury. *Br. J. Anaesth.* **91**, 781–786 (2003).
- 1928 180. Hemmings, H. C. *et al.* Emerging molecular mechanisms of general anesthetic action.  
1929 *Trends Pharmacol. Sci.* **26**, 503–510 (2005).
- 1930 181. Bademosi, A. T. *et al.* Trapping of Syntaxin1a in Presynaptic Nanoclusters by a  
1931 Clinically Relevant General Anesthetic. *Cell Rep.* **22**, 427–440 (2018).
- 1932 182. Wang, Y. *et al.* Effects of propofol on the dopamine, metabolites and GABAA receptors  
1933 in media prefrontal cortex in freely moving rats. *Am J Transl Res* vol. 8 2301–2308  
1934 [www.ajtr.org/ISSN:1943-8141/AJTR0024580](http://www.ajtr.org/ISSN:1943-8141/AJTR0024580) (2016).
- 1935 183. Guo, J. *et al.* Dopamine transporter in the ventral tegmental area modulates recovery  
1936 from propofol anesthesia in rats. *J. Chem. Neuroanat.* **121**, 102083 (2022).
- 1937 184. Naci, L. *et al.* Functional diversity of brain networks supports consciousness and verbal  
1938 intelligence. *Sci. Rep.* **8**, 1–15 (2018).
- 1939 185. Coppola, P. *et al.* Network dynamics scale with levels of awareness. *NeuroImage*  
1940 119128 (2022) doi:10.1016/J.NEUROIMAGE.2022.119128.
- 1941 186. Kandeepan, S. *et al.* Modeling an auditory stimulated brain under altered states of  
1942 consciousness using the generalized ising model. *NeuroImage* **223**, 117367 (2020).
- 1943 187. Solt, K., Eger, E. I. & Raines, D. E. Differential modulation of human N-methyl-D-  
1944 aspartate receptors by structurally diverse general anesthetics. *Anesth. Analg.* **102**,  
1945 1407–1411 (2006).

- 1946 188. Hollmann, M. W., Liu, H. T., Hoenemann, C. W., Liu, W. H. & Durieux, M. E. Modulation  
1947 of NMDA receptor function by ketamine and magnesium. Part II: interactions with  
1948 volatile anesthetics. *Anesth. Analg.* **92**, 1182–1191 (2001).
- 1949 189. Scheller, M., Bufler, J., Schneck, H., Kochs, E. & Franke, C. Isoflurane and sevoflurane  
1950 interact with the nicotinic acetylcholine receptor channels in micromolar concentrations.  
1951 *Anesthesiology* **86**, 118–127 (1997).
- 1952 190. Alkire, M. T., McReynolds, J. R., Hahn, E. L. & Trivedi, A. N. Thalamic microinjection of  
1953 nicotine reverses sevoflurane-induced loss of righting reflex in the rat. *Anesthesiology*  
1954 **107**, 264–272 (2007).
- 1955 191. Palanca, B. J. A., Avidan, M. S. & Mashour, G. A. Human neural correlates of  
1956 sevoflurane-induced unconsciousness. *BJA Br. J. Anaesth.* **119**, 573–582 (2017).
- 1957 192. Golkowski, D. *et al.* Coherence of BOLD signal and electrical activity in the human  
1958 brain during deep sevoflurane anesthesia. *Brain Behav.* **7**, 1–8 (2017).
- 1959 193. Golkowski, D. *et al.* Changes in Whole Brain Dynamics and Connectivity Patterns  
1960 during Sevoflurane- and Propofol-induced Unconsciousness Identified by Functional  
1961 Magnetic Resonance Imaging. *Anesthesiology* **130**, 898–911 (2019).
- 1962 194. Luppi, A. I. *et al.* Brain network integration dynamics are associated with loss and  
1963 recovery of consciousness induced by sevoflurane. *Hum. Brain Mapp.* (2021)  
1964 doi:10.1002/hbm.25405.
- 1965 195. Basso, L. *et al.* Antidepressant and neurocognitive effects of serial ketamine  
1966 administration versus ECT in depressed patients. *J. Psychiatr. Res.* **123**, 1–8 (2020).
- 1967 196. Phillips, J. L. *et al.* Single and repeated ketamine infusions for reduction of suicidal  
1968 ideation in treatment-resistant depression. *Neuropsychopharmacol. Off. Publ. Am. Coll.*  
1969 *Neuropsychopharmacol.* **45**, 606–612 (2020).
- 1970 197. Corlett, P. R., Honey, G. D. & Fletcher, P. C. Prediction error, ketamine and psychosis:  
1971 An updated model. *J. Psychopharmacol. (Oxf.)* **30**, 1145–1155 (2016).

- 1972 198. Moore, J. W. *et al.* Ketamine administration in healthy volunteers reproduces aberrant  
1973 agency experiences associated with schizophrenia. *Cognit. Neuropsychiatry* **16**, 364–  
1974 381 (2011).
- 1975 199. Studerus, E., Gamma, A. & Vollenweider, F. X. Psychometric evaluation of the altered  
1976 states of consciousness rating scale (OAV). *PLoS ONE* **5**, (2010).
- 1977 200. Corlett, P. R. *et al.* Frontal responses during learning predict vulnerability to the  
1978 psychotogenic effects of ketamine: Linking cognition, brain activity, and psychosis.  
1979 *Arch. Gen. Psychiatry* **63**, 611–621 (2006).
- 1980 201. Marona-Lewicka, D. *et al.* Re-evaluation of lisuride pharmacology: 5-  
1981 hydroxytryptamine<sub>1A</sub> receptor-mediated behavioral effects overlap its other properties  
1982 in rats. *Psychopharmacology (Berl.)* **164**, 93–107 (2002).
- 1983 202. Passie, T., Halpern, J. H., Stichtenoth, D. O., Emrich, H. M. & Hintzen, A. The  
1984 pharmacology of lysergic acid diethylamide: A review. *CNS Neurosci. Ther.* **14**, 295–  
1985 314 (2008).
- 1986 203. Kraehenmann, R. *et al.* Dreamlike effects of LSD on waking imagery in humans depend  
1987 on serotonin 2A receptor activation. *Psychopharmacology (Berl.)* 1–16 (2017)  
1988 doi:10.1007/s00213-017-4610-0.
- 1989 204. Tagliazucchi, E. *et al.* Increased Global Functional Connectivity Correlates with LSD-  
1990 Induced Ego Dissolution. *Curr. Biol.* **26**, 1043–1050 (2016).
- 1991 205. Vollenweider, F. X., Vollenweider-Scherpenhuyzen, M. F., Bäbler, A., Vogel, H. & Hell,  
1992 D. Psilocybin induces schizophrenia-like psychosis in humans via a serotonin-2 agonist  
1993 action. *Neuroreport* **9**, 3897–3902 (1998).
- 1994 206. Passie, T., Seifert, J., Schneider, U. & Emrich, H. M. The pharmacology of psilocybin.  
1995 *Addict. Biol.* **7**, 357–364 (2002).
- 1996 207. González-Maeso, J. *et al.* Hallucinogens recruit specific cortical 5-HT(2A) receptor-  
1997 mediated signaling pathways to affect behavior. *Neuron* **53**, 439–452 (2007).

- 1998 208. McKenna, D. J., Repke, D. B., Lo, L. & Peroutka, S. J. Differential interactions of  
1999 indolealkylamines with 5-hydroxytryptamine receptor subtypes. *Neuropharmacology* **29**,  
2000 193–198 (1990).
- 2001 209. Halberstadt, A. L., Koedood, L., Powell, S. B. & Geyer, M. A. Differential contributions  
2002 of serotonin receptors to the behavioral effects of indoleamine hallucinogens in mice. *J.*  
2003 *Psychopharmacol. Oxf. Engl.* **25**, 1548–1561 (2011).
- 2004 210. Callaway, J. C. *et al.* Pharmacokinetics of Hoasca alkaloids in healthy humans. *J.*  
2005 *Ethnopharmacol.* **65**, 243–256 (1999).
- 2006 211. Fontanilla, D. *et al.* The hallucinogen N,N-dimethyltryptamine (DMT) is an endogenous  
2007 sigma-1 receptor regulator. *Science* **323**, 934–937 (2009).
- 2008 212. McKenna, D. J., Towers, G. H. & Abbott, F. Monoamine oxidase inhibitors in South  
2009 American hallucinogenic plants: tryptamine and beta-carboline constituents of  
2010 ayahuasca. *J. Ethnopharmacol.* **10**, 195–223 (1984).
- 2011 213. Buckholtz, N. S. & Boggan, W. O. Monoamine oxidase inhibition in brain and liver  
2012 produced by  $\beta$ -carbolines: structure-activity relationships and substrate specificity.  
2013 *Biochem. Pharmacol.* **26**, 1991–1996 (1977).
- 2014 214. Mckenna, D., Riba, J., Mckenna, D. & Riba, J. New World Tryptamine Hallucinogens  
2015 and the Neuroscience of Ayahuasca. *Curr Top. Behav Neurosci* **36**, 283–311 (2016).
- 2016 215. Ghahremani, D. G. *et al.* Effect of Modafinil on Learning and Task-Related Brain  
2017 Activity in Methamphetamine-Dependent and Healthy Individuals.  
2018 *Neuropsychopharmacology* **36**, 950–959 (2011).
- 2019 216. Ishizuka, T., Murotani, T. & Yamatodani, A. Modanifil activates the histaminergic  
2020 system through the orexinergic neurons. *Neurosci. Lett.* **483**, 193–196 (2010).
- 2021 217. Volkow, N. D. *et al.* Effects of Modafinil on Dopamine and Dopamine Transporters in  
2022 the Male Human Brain: Clinical Implications. *JAMA J. Am. Med. Assoc.* **301**, 1148–  
2023 1154 (2009).
- 2024 218. Gass, J. T. & Foster Olive, M. Glutamatergic substrates of drug addiction and  
2025 alcoholism. *Biochem. Pharmacol.* **75**, 218–265 (2008).

- 2026 219. Wisor, J. P. *et al.* Dopaminergic role in stimulant-induced wakefulness. *J. Neurosci. Off.*  
2027 *J. Soc. Neurosci.* **21**, 1787–1794 (2001).
- 2028 220. Madras, B. K. *et al.* Modafinil Occupies Dopamine and Norepinephrine Transporters in  
2029 Vivo and Modulates the Transporters and Trace Amine Activity in Vitro. *J. Pharmacol.*  
2030 *Exp. Ther.* **319**, 561–569 (2006).
- 2031 221. Cera, N., Tartaro, A., Sensi, S. L. & Jan Stam, C. Modafinil Alters Intrinsic Functional  
2032 Connectivity of the Right Posterior Insula: A Pharmacological Resting State fMRI Study.  
2033 *PLOS ONE* (2014) doi:10.1371/journal.pone.0107145.
- 2034 222. Hannestad, J. *et al.* Clinically relevant doses of methylphenidate significantly occupy  
2035 norepinephrine transporters in humans in vivo. *Biol. Psychiatry* **68**, 854–860 (2010).
- 2036 223. Rowley, H. L. *et al.* Differences in the neurochemical and behavioural profiles of  
2037 lisdexamfetamine methylphenidate and modafinil revealed by simultaneous dual-probe  
2038 microdialysis and locomotor activity measurements in freely-moving rats. *J.*  
2039 *Psychopharmacol. Oxf. Engl.* **28**, 254–269 (2014).
- 2040 224. Koda, K. *et al.* Effects of acute and chronic administration of atomoxetine and  
2041 methylphenidate on extracellular levels of noradrenaline, dopamine and serotonin in the  
2042 prefrontal cortex and striatum of mice. *J. Neurochem.* **114**, 259–270 (2010).
- 2043 225. Williard, R. L., Middaugh, L. D., Zhu, H.-J. B. & Patrick, K. S. Methylphenidate and its  
2044 ethanol transesterification metabolite ethylphenidate: brain disposition, monoamine  
2045 transporters and motor activity. *Behav. Pharmacol.* **18**, 39–51 (2007).
- 2046 226. Markowitz, J. S., DeVane, C. L., Pestreich, L. K., Patrick, K. S. & Muniz, R. A  
2047 comprehensive in vitro screening of d-, l-, and dl-threo-methylphenidate: an exploratory  
2048 study. *J. Child Adolesc. Psychopharmacol.* **16**, 687–698 (2006).
- 2049 227. Volkow, N. D., Fowler, J. S., Wang, G., Ding, Y. & Gatley, S. J. Mechanism of action of  
2050 methylphenidate: insights from PET imaging studies. *J. Atten. Disord.* **6 Suppl 1**, S31-  
2051 43 (2002).
- 2052 228. Volkow, N. D. *et al.* Dopamine transporter occupancies in the human brain induced by  
2053 therapeutic doses of oral methylphenidate. *Am. J. Psychiatry* **155**, 1325–1331 (1998).



- 2054 229. Whitfield-Gabrieli, S. & Nieto-Castanon, A. Conn: A Functional Connectivity Toolbox for  
2055 Correlated and Anticorrelated Brain Networks. *Brain Connect.* **2**, 125–141 (2012).
- 2056 230. Power, J. D., Barnes, K. A., Snyder, A. Z., Schlaggar, B. L. & Petersen, S. E. Spurious  
2057 but systematic correlations in functional connectivity MRI networks arise from subject  
2058 motion. *NeuroImage* **59**, 2142–2154 (2012).
- 2059 231. Behzadi Y, Restom K, Liau J, & Liu TT. A component based noise correction method  
2060 (CompCor) for BOLD and perfusion based fMRI. *NeuroImage* **37**, 90–101 (2007).
- 2061 232. Andellini, M., Cannatà, V., Gazzellini, S., Bernardi, B. & Napolitano, A. Test-retest  
2062 reliability of graph metrics of resting state MRI functional brain networks: A review. *J.*  
2063 *Neurosci. Methods* **253**, 183–192 (2015).
- 2064 233. Lydon-Staley, D. M., Ciric, R., Satterthwaite, T. D. & Bassett, D. S. Evaluation of  
2065 confound regression strategies for the mitigation of micromovement artifact in studies of  
2066 dynamic resting-state functional connectivity and multilayer network modularity. *Netw.*  
2067 *Neurosci.* **3**, 427–454 (2019).
- 2068 234. Power, J. D. *et al.* Methods to detect, characterize, and remove motion artifact in  
2069 resting state fMRI. *NeuroImage* **84**, 320–341 (2014).
- 2070 235. Murphy, K. & Fox, M. D. Towards a consensus regarding global signal regression for  
2071 resting state functional connectivity MRI. *NeuroImage* **154**, 169–173 (2017).
- 2072 236. Tanabe, S. *et al.* Altered Global Brain Signal during Physiologic, Pharmacologic, and  
2073 Pathologic States of Unconsciousness in Humans and Rats. *Anesthesiology* 1392–  
2074 1406 (2020) doi:10.1097/ALN.0000000000003197.
- 2075 237. Thompson, P. M. *et al.* ENIGMA and global neuroscience: A decade of large-scale  
2076 studies of the brain in health and disease across more than 40 countries. *Transl.*  
2077 *Psychiatry* **10**, 1–28 (2020).
- 2078  
2079  
2080
